# Supplementary material
Source: publisher figshare collection journal article supplement (https://f1000.figshare.com/ndownloader/files/1648523)
Supplement: Supplementary file 1 [file 1648523]

sample	mainsource	substrate	well	0.0	0.5	1.0	1.5	2.0	2.5	3.0	3.5	4.0	4.5	5.0	5.5	6.0	6.5	7.0	7.5	8.0	8.5	9.0	9.5	10.0	10.5	11.0	11.5	12.0	12.5	13.0	13.5	14.0	14.5	15.0	15.5	16.0	16.5	17.0	17.5	18.0	18.5	19.0	19.5	20.0	20.5	21.0	21.5	22.0	22.5
csedlakii_ID952	Carbon	Propionate	A1	0.10453	0.104947	0.114528	0.116269	0.116383	0.115607	0.116536	0.11753	0.118152	0.119341	0.120139	0.121245	0.122514	0.124016	0.125516	0.127827	0.129773	0.130804	0.130711	0.131162	0.132731	0.134133	0.136762	0.139539	0.141909	0.144967	0.149113	0.153202	0.157482	0.161931	0.164667	0.1696	0.175117	0.176953	0.183674	0.194709	0.202029	0.206005	0.209033	0.213121	0.212458	0.210747	0.203678	0.195988	0.191962	0.188594
csedlakii_ID952	Carbon	L-Glutamic Acid	A2	0.102661	0.108163	0.11722	0.121952	0.122066	0.121266	0.124372	0.126286	0.128606	0.130428	0.132955	0.134912	0.137041	0.137904	0.139853	0.142198	0.144316	0.145812	0.144409	0.144737	0.143751	0.145021	0.146974	0.148801	0.151956	0.154045	0.157749	0.161033	0.163799	0.167139	0.170606	0.175982	0.182031	0.185046	0.19367	0.206271	0.216108	0.221852	0.227264	0.231222	0.23555	0.237169	0.234164	0.231118	0.23045	0.231272
csedlakii_ID952	Carbon	D-Glucose	A3	0.106879	0.115434	0.126365	0.130607	0.133843	0.139367	0.149817	0.164206	0.182132	0.202798	0.233796	0.275364	0.318144	0.33042	0.382647	0.410491	0.440015	0.461041	0.487839	0.495831	0.51665	0.528104	0.535722	0.544431	0.551188	0.565869	0.562705	0.573462	0.56892	0.576033	0.577952	0.583014	0.579599	0.584072	0.596958	0.601012	0.606403	0.597177	0.603092	0.601378	0.612533	0.605456	0.603958	0.601977	0.606731	0.596333
csedlakii_ID952	Carbon	Potassium Sorbate	A4	0.1097	0.11366	0.121106	0.121304	0.119567	0.118083	0.118931	0.119338	0.120095	0.120891	0.122821	0.12374	0.124683	0.125329	0.126171	0.127645	0.128829	0.129228	0.128075	0.127924	0.126894	0.127452	0.12849	0.130323	0.131927	0.134136	0.135668	0.137578	0.13896	0.139933	0.140802	0.14126	0.141217	0.140886	0.139646	0.138266	0.135865	0.132937	0.133012	0.132383	0.134089	0.134882	0.136262	0.137743	0.138182	0.137601
csedlakii_ID952	Carbon	Lactulose	A5	0.103337	0.114017	0.120646	0.121007	0.119684	0.11694	0.117631	0.117163	0.116904	0.117331	0.118419	0.118609	0.119166	0.11941	0.119653	0.119927	0.120479	0.120725	0.119867	0.119653	0.117966	0.117845	0.118547	0.118788	0.1195	0.120382	0.120362	0.121451	0.121925	0.122203	0.122513	0.12322	0.124463	0.125155	0.128812	0.133363	0.136734	0.135965	0.137159	0.136561	0.137298	0.135827	0.133894	0.130155	0.128196	0.127615
csedlakii_ID952	Carbon	Glycerol	A6	0.102512	0.111519	0.117469	0.119082	0.119741	0.120877	0.125016	0.131029	0.14015	0.14801	0.15674	0.164958	0.175444	0.188007	0.20136	0.218212	0.233845	0.247365	0.261801	0.272171	0.294088	0.315397	0.335343	0.365164	0.38644	0.425463	0.44024	0.47639	0.496961	0.528893	0.547235	0.56598	0.578854	0.603579	0.623172	0.647553	0.66345	0.67233	0.680249	0.689094	0.691953	0.692356	0.697006	0.700135	0.703776	0.704832
csedlakii_ID952	Carbon	Myo-Inositol	A7	0.101583	0.115907	0.120093	0.120703	0.120655	0.11901	0.120032	0.120238	0.121068	0.12168	0.123587	0.124416	0.126107	0.126414	0.128578	0.129865	0.132118	0.134607	0.135084	0.136329	0.136176	0.137896	0.141091	0.144653	0.14938	0.153536	0.158128	0.163091	0.168535	0.174325	0.180148	0.18603	0.19397	0.201075	0.209831	0.218175	0.224906	0.227523	0.23364	0.240561	0.248835	0.256736	0.263101	0.267498	0.272588	0.280449
csedlakii_ID952	Carbon	D-Serine	A8	0.104155	0.110917	0.12063	0.121746	0.122922	0.123615	0.1287	0.134542	0.140453	0.146711	0.156029	0.165575	0.175702	0.189132	0.204175	0.215175	0.223973	0.230402	0.24711	0.262535	0.276296	0.287636	0.296758	0.302571	0.31272	0.316244	0.321776	0.327048	0.340264	0.349558	0.358898	0.3669	0.376636	0.383796	0.395546	0.401101	0.418923	0.418095	0.433051	0.432966	0.445591	0.45617	0.462381	0.468276	0.474473	0.478488
csedlakii_ID952	Carbon	D-Galactose	A9	0.103475	0.110761	0.121473	0.124365	0.126091	0.127479	0.134678	0.144012	0.155967	0.164061	0.173989	0.182778	0.194093	0.203096	0.216785	0.229951	0.247149	0.263479	0.286569	0.312779	0.343033	0.360276	0.364725	0.368143	0.367318	0.373395	0.381295	0.392719	0.405224	0.417813	0.430104	0.439418	0.448158	0.456482	0.463473	0.470569	0.47679	0.477501	0.48351	0.483652	0.488788	0.494384	0.498486	0.503536	0.508871	0.504658
csedlakii_ID952	Carbon	Oxalic Acid	A10	0.107624	0.112161	0.111253	0.111737	0.111571	0.112278	0.114265	0.115778	0.117415	0.119062	0.12117	0.122662	0.125427	0.12566	0.127002	0.127057	0.127489	0.12975	0.129471	0.131183	0.131185	0.131616	0.134229	0.134472	0.136569	0.138438	0.138709	0.139808	0.139538	0.140269	0.142779	0.145032	0.147438	0.149359	0.150431	0.153218	0.152903	0.151677	0.152585	0.152639	0.15479	0.155258	0.156203	0.156104	0.156291	0.15676
csedlakii_ID952	Carbon	Malic Acid	A11	0.100368	0.10049	0.103293	0.104768	0.10567	0.105674	0.10678	0.106977	0.107797	0.108968	0.110054	0.110779	0.111121	0.110945	0.111483	0.111699	0.112064	0.113459	0.112762	0.113782	0.113524	0.114154	0.116088	0.11747	0.119935	0.121793	0.124014	0.126536	0.129587	0.132244	0.134866	0.138375	0.142114	0.145409	0.148908	0.154345	0.157469	0.158477	0.162377	0.16646	0.170497	0.174033	0.1776	0.180983	0.185026	0.189692
csedlakii_ID952	Carbon	L-Methionine	A12	0.103232	0.0997695	0.100075	0.0997994	0.10013	0.10025	0.100721	0.10104	0.101318	0.101966	0.102383	0.101942	0.10226	0.102279	0.102759	0.10315	0.103043	0.103098	0.103061	0.102699	0.102525	0.102423	0.102516	0.102832	0.103071	0.102646	0.103083	0.102898	0.103042	0.102839	0.103375	0.103945	0.103746	0.103549	0.104007	0.105618	0.106155	0.105966	0.105698	0.105788	0.106811	0.106382	0.10585	0.105313	0.1044	0.104731
csedlakii_ID952	Carbon	Glycine	B1	0.105459	0.101838	0.108797	0.112816	0.1131	0.113448	0.11384	0.11408	0.114233	0.114842	0.115355	0.116029	0.117246	0.117724	0.118545	0.119432	0.120175	0.119009	0.117647	0.116598	0.116233	0.116137	0.116348	0.117757	0.11779	0.118204	0.119522	0.120353	0.121305	0.123886	0.123726	0.125175	0.127173	0.127165	0.130306	0.134109	0.137366	0.138741	0.138906	0.140823	0.140101	0.13932	0.137213	0.133338	0.132213	0.131923
csedlakii_ID952	Carbon	Negative Control	B2	0.108103	0.110703	0.113279	0.115456	0.115455	0.115289	0.117107	0.117944	0.118521	0.119701	0.120771	0.121815	0.122559	0.122646	0.123466	0.124673	0.125131	0.124494	0.12296	0.121772	0.120664	0.119837	0.120026	0.120336	0.121095	0.121569	0.122088	0.122784	0.123815	0.125549	0.125308	0.125793	0.127701	0.127634	0.129187	0.132134	0.134681	0.13507	0.135081	0.135356	0.134597	0.134307	0.132794	0.130289	0.128707	0.127565
csedlakii_ID952	Carbon	Quinate	B3	0.104336	0.108522	0.11204	0.112595	0.112311	0.112809	0.113342	0.113785	0.114147	0.115074	0.115532	0.116785	0.117302	0.117591	0.118056	0.119009	0.11961	0.119299	0.11845	0.118103	0.117125	0.116814	0.116945	0.118224	0.118512	0.118762	0.119632	0.120935	0.121163	0.122948	0.123259	0.123694	0.125167	0.12613	0.127371	0.130224	0.132051	0.132524	0.133075	0.133561	0.133292	0.132733	0.131608	0.130161	0.128555	0.127621
csedlakii_ID952	Carbon	Succinate	B4	0.108126	0.112064	0.118786	0.120601	0.121475	0.12288	0.125822	0.129133	0.133997	0.139769	0.146974	0.153201	0.158799	0.163223	0.164968	0.170222	0.178552	0.188011	0.197204	0.207016	0.216459	0.226722	0.2362	0.244881	0.25295	0.256496	0.24858	0.237198	0.235981	0.237587	0.247566	0.262168	0.276724	0.29339	0.308513	0.328352	0.34912	0.356637	0.373559	0.379392	0.398094	0.413539	0.430704	0.439864	0.449266	0.443447
csedlakii_ID952	Carbon	Dulcitol	B5	0.10816	0.119549	0.126675	0.130151	0.129989	0.130021	0.131345	0.131997	0.133198	0.134556	0.137186	0.141803	0.145934	0.15499	0.162102	0.164989	0.184403	0.202691	0.217863	0.233865	0.2418	0.259778	0.28326	0.326748	0.36684	0.414272	0.460645	0.493089	0.51154	0.502152	0.521377	0.537039	0.546135	0.554424	0.564167	0.573901	0.58254	0.58571	0.591608	0.594963	0.600129	0.608074	0.613614	0.615299	0.617982	0.618346
csedlakii_ID952	Carbon	Alpha-D-Glucose	B6	0.110352	0.122257	0.129358	0.132246	0.134677	0.139239	0.148131	0.159133	0.174345	0.192933	0.221868	0.269437	0.314173	0.382072	0.41353	0.424107	0.439046	0.461313	0.479538	0.494871	0.509046	0.514408	0.52548	0.537664	0.533667	0.541129	0.551961	0.552058	0.554694	0.554099	0.561315	0.563116	0.565273	0.573863	0.5718	0.583034	0.581079	0.588052	0.583814	0.590485	0.586803	0.596381	0.597989	0.598973	0.607286	0.602643
csedlakii_ID952	Carbon	L-Xylose	B7	0.104161	0.114293	0.11914	0.118811	0.118269	0.116732	0.11661	0.116827	0.11695	0.117535	0.118323	0.11857	0.119032	0.118555	0.119245	0.118819	0.11951	0.120517	0.12005	0.11938	0.11845	0.11803	0.11825	0.118187	0.118882	0.119891	0.119708	0.119313	0.120753	0.120956	0.120799	0.120901	0.12187	0.12192	0.122674	0.124362	0.126794	0.128204	0.130197	0.129251	0.130203	0.128917	0.12855	0.126877	0.124877	0.125222
csedlakii_ID952	Carbon	L-Aspartic Acid	B8	0.101724	0.111588	0.11829	0.119114	0.119322	0.11893	0.120076	0.121276	0.12348	0.12583	0.128283	0.130551	0.133045	0.135159	0.138593	0.140682	0.144147	0.148568	0.150046	0.151671	0.153638	0.157713	0.162894	0.169183	0.176917	0.18372	0.189607	0.195273	0.200671	0.206068	0.2104	0.214571	0.220548	0.226681	0.234957	0.244667	0.25413	0.262078	0.269916	0.271078	0.271015	0.268987	0.2666	0.261022	0.268187	0.26215
csedlakii_ID952	Carbon	D-Fructose	B9	0.106514	0.112104	0.121561	0.124266	0.125645	0.127852	0.132789	0.139874	0.148772	0.158095	0.17147	0.188674	0.213204	0.243159	0.301175	0.38579	0.426138	0.451151	0.467142	0.480031	0.480909	0.495284	0.502117	0.511822	0.521461	0.524557	0.532658	0.541867	0.553066	0.561591	0.56834	0.580036	0.576571	0.584913	0.589811	0.589479	0.596898	0.602749	0.605719	0.605003	0.609388	0.618975	0.618399	0.622405	0.62636	0.62978
csedlakii_ID952	Carbon	L-Valine	B10	0.110146	0.112668	0.112803	0.112832	0.11297	0.112027	0.112292	0.112072	0.112386	0.112593	0.1129	0.113005	0.113568	0.112393	0.112935	0.112139	0.112453	0.113516	0.112583	0.11205	0.110732	0.110295	0.110727	0.10951	0.110423	0.111092	0.11072	0.109658	0.11071	0.110757	0.109785	0.110441	0.111	0.111118	0.110722	0.112904	0.114526	0.115581	0.116939	0.11666	0.117181	0.117438	0.117328	0.115427	0.115015	0.116286
csedlakii_ID952	Carbon	Pyruvate	B11	0.105362	0.108704	0.110271	0.112034	0.114968	0.115725	0.12266	0.128268	0.137749	0.150195	0.169911	0.194864	0.223629	0.25435	0.27561	0.294586	0.311083	0.321191	0.333721	0.342313	0.350874	0.363624	0.372007	0.376907	0.38512	0.391446	0.396186	0.399358	0.411938	0.417993	0.428438	0.438226	0.439433	0.452177	0.461363	0.469703	0.4799	0.48522	0.490799	0.494011	0.506605	0.511536	0.518733	0.521569	0.528618	0.53146
csedlakii_ID952	Carbon	Lactate	B12	0.100166	0.105316	0.103324	0.104532	0.1071	0.109937	0.114726	0.119455	0.124359	0.130095	0.136746	0.141769	0.149289	0.157627	0.1665	0.175769	0.187894	0.199878	0.211245	0.221988	0.235214	0.252218	0.266798	0.291654	0.316807	0.336099	0.357472	0.379698	0.40748	0.429848	0.455244	0.48527	0.512149	0.549335	0.58182	0.612202	0.645371	0.676248	0.700749	0.731516	0.753582	0.776327	0.802325	0.824095	0.841347	0.860702
csedlakii_ID952	Carbon	Citric Acid	C1	0.103432	0.0995898	0.107007	0.109466	0.109435	0.1102	0.110186	0.110559	0.110716	0.111891	0.113102	0.113357	0.114714	0.11532	0.117357	0.11924	0.121367	0.123092	0.124823	0.126476	0.128656	0.131713	0.135246	0.139507	0.144592	0.149415	0.155164	0.16017	0.166827	0.17283	0.17917	0.186488	0.194389	0.199512	0.207858	0.21692	0.222986	0.221493	0.217938	0.208757	0.204231	0.20139	0.199543	0.199322	0.199537	0.200073
csedlakii_ID952	Carbon	D-Mannose	C2	0.108057	0.112963	0.122755	0.127212	0.129272	0.134207	0.14116	0.148429	0.15486	0.162971	0.175993	0.192095	0.215004	0.242557	0.287896	0.356925	0.331649	0.363073	0.440572	0.477213	0.526384	0.546847	0.553931	0.57187	0.579066	0.595147	0.601034	0.600496	0.618802	0.616765	0.633792	0.630175	0.631719	0.645531	0.657419	0.665838	0.681341	0.683767	0.691529	0.695649	0.711053	0.711543	0.719381	0.73491	0.73706	0.734445
csedlakii_ID952	Carbon	L-Serine	C3	0.106105	0.106805	0.117441	0.119669	0.120963	0.122911	0.125851	0.128837	0.131652	0.13505	0.138454	0.144036	0.148473	0.152798	0.156897	0.161954	0.166418	0.169036	0.171466	0.172614	0.174421	0.176622	0.180912	0.185895	0.19162	0.196601	0.201538	0.207072	0.21342	0.21912	0.22393	0.22966	0.235977	0.241506	0.249076	0.258653	0.267043	0.272218	0.27828	0.283198	0.287594	0.293935	0.297045	0.299367	0.303426	0.308244
csedlakii_ID952	Carbon	Salicoside	C4	0.107356	0.110186	0.119637	0.119855	0.119106	0.118661	0.119528	0.120358	0.122064	0.123487	0.124729	0.126663	0.127934	0.128574	0.129647	0.130708	0.132518	0.133301	0.134738	0.134026	0.133948	0.133714	0.134811	0.135409	0.137127	0.139029	0.139039	0.139987	0.140815	0.14105	0.140748	0.139799	0.14043	0.140582	0.142456	0.146552	0.149403	0.151119	0.152294	0.152546	0.152968	0.152737	0.151464	0.149017	0.147333	0.148405
csedlakii_ID952	Carbon	Cellobiose	C5	0.104254	0.109428	0.12086	0.12108	0.1208	0.120433	0.121524	0.122425	0.123356	0.124814	0.126191	0.12999	0.133733	0.13772	0.146031	0.157585	0.172162	0.187454	0.210551	0.238797	0.261858	0.274236	0.300165	0.358398	0.413687	0.436342	0.464985	0.459251	0.458863	0.476162	0.485248	0.497033	0.50266	0.520568	0.518348	0.53423	0.545595	0.550548	0.567845	0.569657	0.572198	0.587515	0.590619	0.595584	0.594754	0.603624
csedlakii_ID952	Carbon	Adonitol	C6	0.105563	0.107626	0.118202	0.118059	0.117518	0.116834	0.116984	0.116913	0.117261	0.117967	0.118213	0.119627	0.120528	0.121558	0.122507	0.124248	0.127786	0.130992	0.132457	0.13212	0.131574	0.131665	0.132804	0.133123	0.134489	0.135907	0.136292	0.137507	0.138701	0.140163	0.140785	0.141427	0.142603	0.143984	0.144357	0.145632	0.147366	0.148819	0.150506	0.15062	0.152387	0.152506	0.153121	0.152675	0.152727	0.152441
csedlakii_ID952	Carbon	D-Glucose-6-Phosphate	C7	0.102649	0.108437	0.123661	0.123811	0.124593	0.12515	0.127601	0.131878	0.137478	0.14647	0.157211	0.167206	0.179867	0.198378	0.231237	0.280677	0.347434	0.413461	0.475078	0.536338	0.540462	0.558881	0.566597	0.573151	0.578568	0.576999	0.582874	0.580065	0.588227	0.59138	0.593894	0.599069	0.595772	0.599377	0.60995	0.609454	0.610265	0.619011	0.622225	0.619916	0.61883	0.626716	0.628832	0.637281	0.645959	0.642082
csedlakii_ID952	Carbon	L-Sorbose	C8	0.113295	0.115434	0.125796	0.125329	0.124211	0.123211	0.122709	0.122507	0.123482	0.127026	0.128583	0.129607	0.130436	0.130649	0.131639	0.132417	0.133966	0.134071	0.134419	0.135222	0.135351	0.134571	0.134557	0.135038	0.135998	0.136867	0.136892	0.136654	0.137929	0.138747	0.138231	0.138447	0.139858	0.139993	0.140583	0.14228	0.143779	0.144782	0.146105	0.145927	0.146344	0.147595	0.147804	0.147233	0.147078	0.147453
csedlakii_ID952	Carbon	D-Arabitol	C9	0.107548	0.10675	0.117597	0.117575	0.117312	0.116863	0.11669	0.116425	0.116421	0.116916	0.117116	0.117485	0.117814	0.117661	0.117903	0.117249	0.118056	0.118376	0.117897	0.117455	0.117036	0.116333	0.116996	0.116216	0.116539	0.116833	0.116869	0.116307	0.116883	0.117847	0.11679	0.117301	0.118375	0.118274	0.118116	0.118974	0.120431	0.120999	0.121997	0.122411	0.122505	0.123325	0.123407	0.123015	0.123192	0.124001
csedlakii_ID952	Carbon	L-Lysine	C10	0.109617	0.107395	0.114096	0.114681	0.115281	0.114467	0.114422	0.11369	0.113713	0.1137	0.113423	0.114687	0.114941	0.114077	0.114066	0.113006	0.113664	0.113939	0.113412	0.112582	0.111003	0.110202	0.110902	0.109366	0.109005	0.109284	0.108733	0.108425	0.108164	0.109214	0.108155	0.108074	0.108406	0.10876	0.108426	0.110667	0.111225	0.110805	0.111119	0.110999	0.110951	0.111138	0.111787	0.111057	0.111039	0.111728
csedlakii_ID952	Carbon	Trehalose	C11	0.10567	0.109224	0.115026	0.120133	0.125973	0.13071	0.14163	0.153362	0.164687	0.181147	0.205255	0.240304	0.302644	0.410151	0.47526	0.478747	0.474995	0.494664	0.501169	0.514257	0.528133	0.526783	0.534135	0.541049	0.544795	0.551682	0.558898	0.569436	0.579279	0.583914	0.588006	0.595754	0.598393	0.605248	0.609653	0.617694	0.621272	0.62437	0.629457	0.632135	0.633374	0.637665	0.640382	0.642968	0.641454	0.645051
csedlakii_ID952	Carbon	Acetic Acid	C12	0.101939	0.102933	0.100363	0.101347	0.102911	0.104281	0.105596	0.106801	0.107924	0.109725	0.111895	0.113891	0.117318	0.120701	0.125025	0.128787	0.133173	0.137703	0.14317	0.148233	0.153188	0.156462	0.159457	0.163939	0.167775	0.172437	0.18069	0.186139	0.193461	0.201166	0.207094	0.2149	0.222971	0.230419	0.238251	0.244618	0.24776	0.249808	0.258893	0.270712	0.280648	0.290787	0.297813	0.311629	0.321084	0.330295
csedlakii_ID952	Carbon	L-Alanine	D1	0.114023	0.108005	0.116479	0.118135	0.115915	0.121268	0.122046	0.121342	0.120922	0.12103	0.121909	0.121816	0.122183	0.122105	0.123061	0.123889	0.12411	0.124261	0.124071	0.12321	0.123036	0.123299	0.124683	0.126212	0.128992	0.130986	0.134266	0.13637	0.13964	0.141995	0.144457	0.147194	0.149001	0.151877	0.158913	0.1659	0.174328	0.180819	0.18698	0.191848	0.196617	0.200594	0.203642	0.205467	0.208422	0.210461
csedlakii_ID952	Carbon	L-Arabinose	D2	0.11507	0.113752	0.119589	0.12448	0.126336	0.129424	0.135264	0.144104	0.156183	0.171731	0.191277	0.215469	0.24703	0.283206	0.335174	0.386357	0.426546	0.446849	0.436378	0.400028	0.381846	0.372871	0.371281	0.374425	0.374288	0.395335	0.39406	0.395028	0.406128	0.414091	0.428946	0.429813	0.425147	0.432407	0.450212	0.462262	0.476675	0.477554	0.487032	0.486516	0.493661	0.494682	0.498989	0.502803	0.506197	0.50666
csedlakii_ID952	Carbon	L-Threonine	D3	0.109419	0.109957	0.113513	0.115056	0.114714	0.114254	0.114913	0.115226	0.115259	0.116221	0.11676	0.117689	0.11816	0.118926	0.119757	0.12022	0.120979	0.120853	0.121189	0.120499	0.120439	0.119402	0.120272	0.120627	0.121343	0.122445	0.12222	0.123014	0.123355	0.123776	0.124436	0.124188	0.124072	0.124437	0.125448	0.128206	0.130235	0.131563	0.13248	0.132367	0.132398	0.132119	0.130977	0.130051	0.128308	0.128903
csedlakii_ID952	Carbon	4 Hydroxy-Phenylacetate	D4	0.105004	0.108774	0.117244	0.116164	0.115966	0.116386	0.117558	0.118495	0.119356	0.120253	0.120529	0.121755	0.122376	0.122973	0.1235	0.124213	0.12498	0.125236	0.126269	0.126622	0.126506	0.126675	0.127246	0.127552	0.128006	0.128674	0.129076	0.12978	0.130177	0.131032	0.131121	0.133118	0.133919	0.134688	0.135406	0.13666	0.137525	0.1378	0.138073	0.138295	0.138622	0.138299	0.138208	0.138197	0.1383	0.138161
csedlakii_ID952	Carbon	D-Ribose	D5	0.104006	0.109212	0.120049	0.121111	0.120921	0.121634	0.123138	0.125851	0.130892	0.138796	0.146644	0.1538	0.162273	0.172272	0.185251	0.199202	0.216871	0.2248	0.231463	0.236472	0.253397	0.279173	0.304539	0.335209	0.355917	0.386012	0.413007	0.435633	0.441622	0.448092	0.450857	0.458337	0.466267	0.472572	0.478384	0.483924	0.490556	0.4979	0.503086	0.510656	0.514226	0.520701	0.525674	0.532573	0.536509	0.540432
csedlakii_ID952	Carbon	Melibiose	D6	0.105222	0.109133	0.119455	0.119455	0.119419	0.11967	0.120626	0.122485	0.126534	0.133425	0.14263	0.153721	0.165481	0.179866	0.203748	0.236445	0.294728	0.360364	0.410492	0.430082	0.459549	0.464768	0.461672	0.480355	0.477275	0.488629	0.507436	0.508457	0.529534	0.529247	0.53554	0.554921	0.537491	0.542552	0.553825	0.557103	0.560949	0.559343	0.569579	0.561544	0.574199	0.573491	0.566215	0.578034	0.579426	0.581522
csedlakii_ID952	Carbon	D-Alanine	D7	0.106645	0.109277	0.12034	0.12101	0.121778	0.122546	0.123569	0.124768	0.126446	0.128988	0.129734	0.132911	0.134725	0.137057	0.139514	0.141669	0.144498	0.147281	0.150006	0.152374	0.154535	0.156444	0.159553	0.160716	0.161999	0.163374	0.166195	0.168513	0.173237	0.178089	0.18196	0.186115	0.190652	0.195639	0.198838	0.205235	0.210686	0.21406	0.217617	0.221031	0.226697	0.232735	0.237824	0.243263	0.250106	0.254803
csedlakii_ID952	Carbon	L-Fucose	D8	0.103343	0.105135	0.117523	0.118027	0.117357	0.116945	0.11651	0.116179	0.116861	0.117786	0.118065	0.119447	0.120641	0.122232	0.124564	0.126696	0.130888	0.135505	0.140854	0.145263	0.148602	0.152438	0.160843	0.17111	0.179635	0.18809	0.196931	0.205365	0.215859	0.223479	0.229088	0.237007	0.243911	0.255629	0.266373	0.284368	0.299909	0.317839	0.333569	0.344747	0.364895	0.378738	0.389489	0.404253	0.423154	0.438037
csedlakii_ID952	Carbon	L-Asparagine	D9	0.109122	0.111228	0.124111	0.124827	0.125739	0.126303	0.1278	0.130006	0.132909	0.135709	0.137644	0.141424	0.144476	0.147191	0.150202	0.152139	0.156979	0.160494	0.164581	0.168423	0.17236	0.176067	0.181094	0.185189	0.189892	0.196199	0.202065	0.207848	0.21562	0.222366	0.228104	0.234537	0.239615	0.246873	0.252242	0.259632	0.265577	0.270721	0.275546	0.279721	0.286664	0.292474	0.298809	0.302828	0.31032	0.318128
csedlakii_ID952	Carbon	L-Leucine	D10	0.110522	0.110492	0.121537	0.121309	0.122048	0.121534	0.121165	0.120259	0.120347	0.120221	0.119428	0.120061	0.120172	0.119487	0.119441	0.118388	0.119529	0.119727	0.120226	0.120129	0.119566	0.119027	0.118741	0.11776	0.117481	0.117821	0.117354	0.117305	0.117493	0.117599	0.117593	0.1175	0.117666	0.117939	0.117124	0.118155	0.118125	0.118061	0.118005	0.118124	0.11874	0.119436	0.120011	0.120949	0.121481	0.121631
csedlakii_ID952	Carbon	D-Aspartic Acid	D11	0.106893	0.1059	0.111686	0.112887	0.114112	0.113511	0.113814	0.112984	0.112935	0.112365	0.111753	0.112169	0.112251	0.112047	0.111995	0.111178	0.11176	0.112362	0.113181	0.113787	0.113347	0.112755	0.11199	0.111896	0.111844	0.111503	0.111355	0.11156	0.111552	0.111647	0.111694	0.111503	0.111319	0.112203	0.112213	0.113258	0.112935	0.112463	0.111988	0.112345	0.112529	0.113483	0.113873	0.115082	0.114931	0.11547
csedlakii_ID952	Carbon	Inosine	D12	0.103558	0.104451	0.109621	0.115753	0.116842	0.119047	0.124307	0.13049	0.13905	0.150684	0.162745	0.175855	0.200385	0.230893	0.270478	0.323963	0.370457	0.432534	0.477471	0.476564	0.55125	0.579781	0.601244	0.616101	0.622405	0.6255	0.6235	0.63309	0.628329	0.637312	0.639847	0.647593	0.644959	0.656094	0.6564	0.664753	0.674455	0.675344	0.681736	0.682446	0.694217	0.692061	0.697419	0.69176	0.698258	0.704323
csedlakii_ID952	Carbon	Thymidine	E1	0.110095	0.105678	0.116535	0.125828	0.127325	0.132414	0.138591	0.14482	0.152839	0.163634	0.177833	0.189534	0.205815	0.221141	0.243768	0.262127	0.282367	0.283114	0.282502	0.261082	0.257065	0.246801	0.236881	0.236551	0.236744	0.239115	0.236768	0.236367	0.243858	0.239915	0.250152	0.24968	0.245042	0.248913	0.257395	0.269352	0.281602	0.282621	0.281822	0.276393	0.286163	0.289559	0.293544	0.296883	0.298937	0.284796
csedlakii_ID952	Carbon	Sucrose	E2	0.107325	0.111719	0.113026	0.118601	0.126911	0.13491	0.14539	0.155514	0.162203	0.167943	0.17535	0.183076	0.187766	0.191952	0.195785	0.199524	0.201835	0.201577	0.199402	0.196834	0.195625	0.195486	0.196501	0.198899	0.201496	0.202367	0.204552	0.205388	0.206799	0.209097	0.211249	0.212285	0.213657	0.214971	0.218864	0.223137	0.226605	0.227908	0.228842	0.229394	0.230484	0.227813	0.225222	0.223893	0.222854	0.222977
csedlakii_ID952	Carbon	D-Xylose	E3	0.105534	0.10358	0.107545	0.109895	0.109452	0.110671	0.112976	0.1168	0.122925	0.133804	0.145008	0.156962	0.172116	0.193206	0.223005	0.268671	0.323104	0.39556	0.419036	0.447759	0.409538	0.411245	0.412024	0.42874	0.43278	0.444686	0.454703	0.452227	0.477639	0.469138	0.490482	0.49762	0.494238	0.504987	0.501152	0.511581	0.536134	0.531392	0.524275	0.532262	0.532164	0.534796	0.541412	0.544335	0.549622	0.540793
csedlakii_ID952	Carbon	L-Cysteine	E4	0.10862	0.108269	0.112266	0.11316	0.112485	0.112063	0.11161	0.11081	0.111049	0.112106	0.112086	0.113365	0.114064	0.115393	0.115697	0.117126	0.117461	0.116464	0.116657	0.115594	0.116041	0.115469	0.116556	0.116855	0.116991	0.118351	0.118213	0.120133	0.119767	0.121424	0.121998	0.122705	0.123576	0.124559	0.125687	0.128284	0.129038	0.129702	0.130627	0.130466	0.13102	0.131244	0.131061	0.130174	0.129563	0.129375
csedlakii_ID952	Carbon	Alpha-D-Lactose	E5	0.103209	0.105567	0.110931	0.112469	0.111832	0.110762	0.110844	0.111496	0.111694	0.113624	0.113829	0.1147	0.115348	0.11703	0.117693	0.119104	0.120486	0.119427	0.12191	0.122757	0.126233	0.131687	0.141126	0.153305	0.17392	0.196539	0.181502	0.200664	0.217847	0.238946	0.267977	0.3106	0.350355	0.399458	0.430424	0.45936	0.46914	0.484926	0.501148	0.523939	0.527204	0.552549	0.556982	0.571189	0.572072	0.586099
csedlakii_ID952	Carbon	Raffinose	E6	0.0972035	0.101402	0.108084	0.111359	0.112804	0.115115	0.120683	0.127477	0.132091	0.141594	0.151185	0.161091	0.170615	0.180796	0.189799	0.194525	0.198184	0.197615	0.197647	0.1934	0.186998	0.182394	0.181501	0.179059	0.176984	0.177274	0.163474	0.15591	0.148517	0.145324	0.143067	0.14176	0.140249	0.139612	0.139994	0.141144	0.140756	0.141022	0.140574	0.140482	0.139995	0.139941	0.139403	0.137539	0.138744	0.138328
csedlakii_ID952	Carbon	D-Asparagine	E7	0.105725	0.107025	0.117205	0.117618	0.118026	0.118067	0.117988	0.118317	0.118856	0.119389	0.118608	0.120057	0.119431	0.120348	0.120776	0.120583	0.121337	0.120767	0.120736	0.120361	0.120355	0.119337	0.120586	0.119546	0.118965	0.119898	0.119616	0.119334	0.119607	0.11941	0.119723	0.119804	0.119694	0.120586	0.120777	0.123365	0.123404	0.123351	0.123312	0.123548	0.123758	0.124269	0.124704	0.123808	0.124745	0.124082
csedlakii_ID952	Carbon	Erythritol	E8	0.106175	0.106903	0.118547	0.118847	0.119034	0.117726	0.116861	0.116471	0.11665	0.116983	0.116089	0.116859	0.116213	0.116641	0.117042	0.116498	0.116765	0.116784	0.116597	0.116223	0.115777	0.114877	0.114999	0.114453	0.11427	0.114897	0.114557	0.11411	0.114834	0.114623	0.114649	0.115332	0.114975	0.115266	0.115183	0.117065	0.117349	0.116746	0.117274	0.117581	0.117486	0.118505	0.118778	0.118335	0.119381	0.119637
csedlakii_ID952	Carbon	D-Cysteine	E9	0.107981	0.109097	0.119084	0.119347	0.120216	0.12066	0.121077	0.120359	0.120286	0.120717	0.119209	0.119214	0.118549	0.118131	0.118757	0.117021	0.116856	0.116785	0.118198	0.117555	0.117261	0.116984	0.116629	0.116426	0.116375	0.117053	0.11673	0.116963	0.117281	0.117073	0.117466	0.117473	0.117199	0.11721	0.116166	0.117268	0.117296	0.11653	0.117059	0.116726	0.116715	0.118294	0.118664	0.118287	0.119007	0.119642
csedlakii_ID952	Carbon	L-Isoleucine	E10	0.101203	0.103342	0.114343	0.115924	0.118138	0.118339	0.117795	0.117214	0.1172	0.117415	0.116785	0.117245	0.117179	0.116856	0.117722	0.116567	0.117226	0.117124	0.117465	0.117432	0.117392	0.117032	0.116641	0.115894	0.11513	0.116224	0.115605	0.115179	0.115935	0.115545	0.116252	0.11642	0.11562	0.116108	0.116523	0.117836	0.117349	0.116698	0.116152	0.116401	0.116301	0.11684	0.117074	0.11785	0.118848	0.1191
csedlakii_ID952	Carbon	L-Cysteic Acid	E11	0.102952	0.103656	0.110015	0.111721	0.110522	0.110918	0.112035	0.111916	0.1115	0.111473	0.110679	0.111125	0.111352	0.111127	0.111002	0.110842	0.11121	0.111336	0.112596	0.113857	0.114959	0.114299	0.113902	0.113499	0.112793	0.11238	0.112767	0.113124	0.113178	0.113522	0.113286	0.113263	0.113419	0.113492	0.113196	0.113061	0.11182	0.110526	0.109745	0.110361	0.111484	0.112469	0.113818	0.115273	0.116089	0.117442
csedlakii_ID952	Carbon	Adenosine	E12	0.103089	0.105453	0.113004	0.119326	0.119652	0.12164	0.126258	0.132127	0.139097	0.149959	0.159176	0.169113	0.186185	0.206403	0.221715	0.241187	0.260624	0.286419	0.307432	0.33288	0.359002	0.372312	0.395929	0.427588	0.446074	0.461048	0.465869	0.486026	0.489446	0.495826	0.502416	0.506432	0.50955	0.511096	0.521218	0.52573	0.520329	0.521471	0.520305	0.524296	0.521944	0.528978	0.526516	0.527851	0.528567	0.52421
csedlakii_ID952	Carbon	Xylitol	F1	0.101906	0.098121	0.106522	0.114267	0.114045	0.114916	0.116823	0.116453	0.115829	0.116367	0.115946	0.115814	0.116207	0.115963	0.115892	0.116524	0.116736	0.116183	0.1154	0.11414	0.114255	0.113771	0.114027	0.113961	0.115329	0.116048	0.116326	0.116927	0.117534	0.117955	0.117941	0.11844	0.118979	0.11943	0.120459	0.122025	0.123023	0.123509	0.123051	0.12319	0.122867	0.121984	0.120727	0.119558	0.118699	0.119329
csedlakii_ID952	Carbon	L-Glutamine	F2	0.107003	0.106025	0.109276	0.116688	0.116151	0.117289	0.120892	0.124516	0.126662	0.131899	0.135336	0.13915	0.142754	0.147406	0.152655	0.15758	0.162626	0.165321	0.168004	0.172531	0.177957	0.183866	0.190775	0.19866	0.205705	0.21292	0.220902	0.228047	0.234725	0.242674	0.249968	0.256688	0.262436	0.268758	0.274958	0.281744	0.286612	0.292046	0.296923	0.302022	0.305954	0.311171	0.313508	0.316114	0.321401	0.325055
csedlakii_ID952	Carbon	L-Rhamnose	F3	0.105591	0.108026	0.109541	0.115715	0.115632	0.117212	0.118843	0.121024	0.12283	0.127156	0.132622	0.139686	0.149517	0.161206	0.175029	0.193134	0.218113	0.244076	0.274923	0.315465	0.404021	0.454949	0.416353	0.406614	0.392816	0.413758	0.405232	0.406778	0.438961	0.434664	0.472474	0.476868	0.474609	0.499616	0.518935	0.529439	0.540523	0.549421	0.559011	0.565647	0.576755	0.576752	0.581782	0.58572	0.594124	0.592898
csedlakii_ID952	Carbon	Putrescine	F4	0.109884	0.108328	0.10977	0.115151	0.115958	0.116637	0.116774	0.117597	0.117076	0.118337	0.118993	0.119871	0.119845	0.121067	0.122099	0.12392	0.124167	0.123954	0.124247	0.123566	0.123844	0.123527	0.124469	0.125826	0.126092	0.127064	0.127711	0.129833	0.130039	0.132007	0.13275	0.133685	0.134441	0.135854	0.137036	0.13874	0.140129	0.141418	0.141792	0.142081	0.14246	0.142727	0.14273	0.142495	0.141545	0.140739
csedlakii_ID952	Carbon	2 Deoxy-D-Ribose	F5	0.103515	0.107598	0.111026	0.115862	0.116573	0.118673	0.120323	0.122905	0.124643	0.127744	0.129119	0.131475	0.132208	0.13393	0.13536	0.13746	0.138322	0.138271	0.139263	0.138697	0.139545	0.139619	0.140574	0.141921	0.141249	0.142535	0.143383	0.144708	0.144649	0.146017	0.147195	0.148398	0.149261	0.15066	0.15096	0.15332	0.154071	0.155242	0.156225	0.156546	0.157332	0.158012	0.158004	0.157206	0.157259	0.156938
csedlakii_ID952	Carbon	L-Arabitol	F6	0.105591	0.104869	0.107275	0.112054	0.111869	0.112349	0.112576	0.11324	0.113249	0.114383	0.114708	0.115836	0.115292	0.116413	0.117568	0.118407	0.119172	0.118431	0.118681	0.11823	0.118446	0.118387	0.119991	0.121351	0.120956	0.122083	0.123305	0.125309	0.126258	0.127384	0.128716	0.129693	0.130225	0.131542	0.132381	0.134734	0.135595	0.137219	0.13757	0.138114	0.138543	0.139537	0.139785	0.138892	0.139278	0.138417
csedlakii_ID952	Carbon	D-Glucosamine	F7	0.106492	0.109885	0.117239	0.123808	0.128105	0.133553	0.140635	0.148699	0.154869	0.16125	0.169577	0.180183	0.194593	0.214368	0.237788	0.258647	0.31556	0.396193	0.449321	0.448787	0.471841	0.476797	0.491466	0.503089	0.511939	0.521599	0.539377	0.543153	0.556995	0.558646	0.56757	0.574701	0.572092	0.577239	0.587555	0.581758	0.587492	0.594409	0.589861	0.596084	0.596794	0.599662	0.599569	0.604092	0.607514	0.614601
csedlakii_ID952	Carbon	L-Phenylalanine	F8	0.107576	0.107751	0.114319	0.117357	0.118657	0.119544	0.119408	0.12041	0.121103	0.122342	0.1216	0.123064	0.122611	0.123906	0.124207	0.124192	0.124724	0.123379	0.124244	0.12361	0.124363	0.123689	0.124158	0.125088	0.123609	0.123934	0.1245	0.124638	0.125145	0.124606	0.125993	0.126325	0.125962	0.126124	0.126194	0.127318	0.126791	0.127637	0.126413	0.126755	0.126927	0.128038	0.128706	0.12812	0.129477	0.129878
csedlakii_ID952	Carbon	D-Glutamic Acid	F9	0.108138	0.107607	0.112847	0.115147	0.115945	0.116581	0.117209	0.117463	0.117728	0.118413	0.118345	0.118971	0.11835	0.118739	0.119031	0.118698	0.119281	0.119102	0.119729	0.120399	0.121112	0.121166	0.121032	0.121246	0.121257	0.12137	0.122016	0.122075	0.122672	0.122862	0.123656	0.123912	0.124128	0.124535	0.124321	0.124631	0.124377	0.12376	0.123303	0.123621	0.124364	0.125642	0.126291	0.127132	0.128421	0.129422
csedlakii_ID952	Carbon	D-Arabinose	F10	0.107097	0.107512	0.114823	0.116914	0.117711	0.118516	0.118383	0.118818	0.119177	0.119656	0.119548	0.120112	0.119517	0.120722	0.12154	0.121887	0.124271	0.125064	0.127863	0.131225	0.136388	0.14133	0.147229	0.1533	0.162022	0.172158	0.183984	0.194614	0.20403	0.212069	0.22079	0.233763	0.254538	0.275557	0.295522	0.310668	0.326809	0.342316	0.365519	0.379095	0.401612	0.43087	0.451947	0.451843	0.467771	0.485861
csedlakii_ID952	Carbon	L-Tryptophan	F11	0.10245	0.109898	0.121716	0.1245	0.126608	0.12931	0.133169	0.133969	0.136069	0.137821	0.138422	0.139435	0.139687	0.140691	0.141114	0.14189	0.14318	0.143699	0.145172	0.146583	0.148109	0.148421	0.148543	0.148509	0.14799	0.147547	0.147805	0.1471	0.14687	0.145897	0.146157	0.14594	0.145018	0.144564	0.144377	0.143799	0.143126	0.14238	0.142406	0.142403	0.142512	0.141971	0.142358	0.142243	0.142627	0.141791
csedlakii_ID952	Carbon	L-Pyro-Glutamic Acid	F12	0.111033	0.102968	0.110024	0.114267	0.11455	0.116515	0.118121	0.120417	0.122484	0.125164	0.126464	0.127755	0.12926	0.129974	0.131026	0.132143	0.133349	0.13373	0.136514	0.13899	0.143196	0.144374	0.145432	0.147187	0.149399	0.150303	0.154329	0.15361	0.157787	0.160119	0.161887	0.166016	0.167157	0.164874	0.164967	0.163001	0.157799	0.151192	0.148274	0.151374	0.156588	0.157999	0.161099	0.167303	0.173089	0.176176
csedlakii_ID952	Nitrogen	Negative Control	G1	0.105095	0.111129	0.122952	0.131612	0.139873	0.14724	0.152023	0.155414	0.158603	0.163791	0.168744	0.174264	0.178655	0.183368	0.189288	0.196015	0.201553	0.204515	0.2053	0.204322	0.20603	0.207153	0.210606	0.214688	0.218803	0.222097	0.225712	0.228069	0.231534	0.234137	0.23578	0.239362	0.242941	0.242774	0.24948	0.25475	0.258357	0.257118	0.26114	0.264135	0.265481	0.265335	0.265472	0.259412	0.255639	0.256463
csedlakii_ID952	Nitrogen	Tyramine	G2	0.109481	0.115816	0.12329	0.132117	0.135447	0.139203	0.142826	0.143998	0.146427	0.150992	0.153775	0.158905	0.162216	0.163869	0.164504	0.163508	0.163648	0.162402	0.162972	0.16189	0.163044	0.164402	0.166436	0.167463	0.1691	0.171683	0.173252	0.175191	0.177562	0.179819	0.182544	0.184581	0.186126	0.18807	0.192564	0.198827	0.202755	0.20482	0.207307	0.208741	0.211221	0.212936	0.21347	0.213862	0.214627	0.216237
csedlakii_ID952	Nitrogen	Uridine	G3	0.101352	0.111861	0.120675	0.131139	0.13808	0.148844	0.153909	0.1599	0.162859	0.168341	0.173486	0.180038	0.184468	0.189936	0.197389	0.204271	0.210006	0.213863	0.2169	0.21718	0.22138	0.224344	0.229262	0.234758	0.238765	0.242536	0.246157	0.250889	0.253684	0.256538	0.260119	0.261995	0.263234	0.264526	0.267668	0.270203	0.271891	0.272665	0.273379	0.274682	0.274917	0.275751	0.274292	0.273869	0.273266	0.273142
csedlakii_ID952	Nitrogen	Inosine	G4	0.100821	0.110991	0.116576	0.129849	0.134542	0.141102	0.147099	0.151962	0.154732	0.158806	0.162061	0.16667	0.169453	0.173571	0.178914	0.184328	0.188796	0.191452	0.193322	0.193815	0.197056	0.199176	0.203097	0.207081	0.210172	0.21252	0.214786	0.21801	0.219658	0.223536	0.22567	0.22774	0.229089	0.230795	0.234594	0.238474	0.240656	0.241404	0.242811	0.244276	0.244293	0.245381	0.244692	0.243504	0.243306	0.243502
csedlakii_ID952	Nitrogen	Histamine	G5	0.104146	0.109781	0.113778	0.123009	0.131044	0.137152	0.140294	0.143723	0.1449	0.148258	0.149882	0.153898	0.155175	0.158053	0.161518	0.165942	0.169622	0.17179	0.172964	0.173394	0.174917	0.176891	0.179812	0.184452	0.187125	0.189445	0.192612	0.195097	0.197518	0.200718	0.203228	0.205296	0.206501	0.207687	0.210928	0.21581	0.220221	0.222451	0.224107	0.225479	0.225882	0.225811	0.224495	0.221939	0.219681	0.219655
csedlakii_ID952	Nitrogen	L-Pyro-Glutamic Acid	G6	0.104238	0.110964	0.11414	0.12229	0.128887	0.135854	0.142803	0.148647	0.151984	0.158363	0.164319	0.171533	0.177778	0.185754	0.194092	0.202059	0.211282	0.216434	0.221577	0.225827	0.231108	0.23547	0.239907	0.244856	0.247631	0.250161	0.253527	0.256556	0.257659	0.258969	0.259736	0.262075	0.2618	0.262198	0.262552	0.266214	0.268108	0.266987	0.265964	0.264735	0.2652	0.265233	0.264884	0.264073	0.263783	0.261292
csedlakii_ID952	Nitrogen	Cytidine	G7	0.10132	0.107191	0.115312	0.122811	0.129331	0.136882	0.148851	0.165974	0.186011	0.212678	0.249873	0.301897	0.384513	0.531215	0.556084	0.574096	0.574143	0.587468	0.607613	0.619043	0.623437	0.630364	0.638104	0.64408	0.64173	0.646002	0.650146	0.653872	0.655654	0.650364	0.659797	0.659303	0.650471	0.659708	0.65317	0.656929	0.660847	0.657573	0.664364	0.659795	0.658744	0.668277	0.66624	0.659898	0.66651	0.670215
csedlakii_ID952	Nitrogen	Adenosine	G8	0.10084	0.104503	0.115325	0.12307	0.128529	0.13782	0.15166	0.167181	0.185667	0.210884	0.244332	0.280311	0.316514	0.343526	0.3773	0.394805	0.401901	0.412016	0.420824	0.429836	0.426895	0.418999	0.423272	0.436218	0.444567	0.451788	0.458491	0.463564	0.468086	0.472188	0.47859	0.482499	0.483709	0.487249	0.489682	0.493865	0.495803	0.496958	0.503336	0.503837	0.504484	0.505855	0.506934	0.50755	0.509297	0.513205
csedlakii_ID952	Nitrogen	L-Arginine	G9	0.104865	0.113035	0.118941	0.125349	0.131191	0.140991	0.150991	0.160256	0.165481	0.170346	0.177571	0.186774	0.196356	0.209216	0.223765	0.238555	0.254483	0.26839	0.284261	0.301017	0.315443	0.32988	0.343432	0.354548	0.364154	0.367492	0.372348	0.368384	0.365497	0.360515	0.358315	0.357291	0.357902	0.36026	0.361097	0.363844	0.366514	0.368025	0.367289	0.368743	0.369921	0.370737	0.370818	0.371037	0.371457	0.372842
csedlakii_ID952	Nitrogen	Thiourea	G10	0.102797	0.106433	0.115311	0.122846	0.128604	0.132329	0.135968	0.139729	0.141939	0.145231	0.1478	0.150442	0.151762	0.154764	0.157306	0.160347	0.164072	0.16648	0.170289	0.174178	0.177658	0.180092	0.181141	0.183855	0.186119	0.187471	0.190364	0.191822	0.194367	0.196983	0.200262	0.202632	0.204414	0.205445	0.206615	0.207729	0.208253	0.206344	0.206424	0.20728	0.2093	0.210781	0.21163	0.213383	0.21587	0.217807
csedlakii_ID952	Nitrogen	Biuret	G11	0.103504	0.108309	0.117406	0.123164	0.129014	0.138298	0.148764	0.154326	0.15849	0.163433	0.167673	0.170636	0.172211	0.174977	0.177822	0.180873	0.184082	0.186261	0.190143	0.194499	0.1988	0.202678	0.206663	0.211617	0.216228	0.219423	0.224818	0.227443	0.231486	0.234736	0.237547	0.240768	0.242594	0.243461	0.245506	0.247691	0.248447	0.247532	0.249289	0.249806	0.250583	0.252349	0.250843	0.251735	0.252037	0.252178
csedlakii_ID952	Nitrogen	Guanidine	G12	0.103458	0.105847	0.108846	0.112353	0.113655	0.114965	0.115973	0.117114	0.118375	0.121073	0.122952	0.124523	0.126209	0.12707	0.128165	0.12953	0.131923	0.133812	0.139263	0.143772	0.148851	0.151527	0.152884	0.15632	0.160212	0.163675	0.169218	0.170762	0.175546	0.178655	0.18063	0.184715	0.187361	0.187623	0.189257	0.188359	0.185722	0.181021	0.184543	0.186406	0.19059	0.191278	0.192966	0.199725	0.203849	0.205991
csedlakii_ID952	Nitrogen	L-Histidine	H1	0.100617	0.115493	0.127476	0.133419	0.139468	0.146131	0.150965	0.154924	0.159115	0.164233	0.17058	0.17476	0.179982	0.184994	0.19247	0.19867	0.204944	0.208548	0.210948	0.212299	0.215127	0.217265	0.22194	0.225122	0.228845	0.229768	0.234416	0.236985	0.242234	0.246949	0.249908	0.252362	0.249802	0.236902	0.225067	0.217831	0.214493	0.205494	0.198438	0.191892	0.188563	0.189302	0.195488	0.197794	0.202336	0.200195
csedlakii_ID952	Nitrogen	Thymine	H2	0.102272	0.109016	0.122179	0.132595	0.141998	0.146139	0.153508	0.157295	0.160784	0.164186	0.169221	0.173204	0.177533	0.182214	0.188996	0.195986	0.201472	0.206034	0.20655	0.205809	0.208617	0.213379	0.219556	0.227956	0.23292	0.236733	0.2422	0.244489	0.249702	0.254585	0.257118	0.26018	0.262822	0.263344	0.27064	0.278613	0.285545	0.290457	0.295652	0.297467	0.298942	0.298454	0.295475	0.289145	0.285711	0.287173
csedlakii_ID952	Nitrogen	L-Glutathione	H3	0.101336	0.108251	0.120284	0.131688	0.146234	0.16155	0.172571	0.183184	0.194233	0.206943	0.222329	0.237882	0.255872	0.270229	0.288235	0.302345	0.315903	0.35208	0.357875	0.349017	0.337674	0.332276	0.327601	0.326813	0.32705	0.330052	0.331579	0.331522	0.334596	0.340146	0.34156	0.345319	0.347196	0.353958	0.360977	0.372804	0.380401	0.388651	0.390415	0.396827	0.397809	0.402354	0.403536	0.400133	0.402495	0.405308
csedlakii_ID952	Nitrogen	Allantoin	H4	0.102565	0.110085	0.12019	0.131921	0.139293	0.142455	0.147792	0.151582	0.156089	0.160915	0.165571	0.169279	0.172694	0.176022	0.182568	0.188685	0.19355	0.197403	0.196484	0.194275	0.195308	0.196894	0.202077	0.208107	0.210839	0.213841	0.217867	0.220489	0.225188	0.231952	0.234742	0.238624	0.241083	0.241936	0.251084	0.26079	0.270353	0.27616	0.280728	0.281227	0.279085	0.279234	0.274161	0.26223	0.257608	0.258351
csedlakii_ID952	Nitrogen	Adenine	H5	0.102272	0.10939	0.114777	0.123494	0.130119	0.139877	0.154181	0.161437	0.16762	0.175229	0.183633	0.191791	0.201167	0.211796	0.22428	0.23786	0.251707	0.265513	0.27938	0.293019	0.306379	0.320026	0.333019	0.338328	0.339839	0.3455	0.347823	0.352018	0.360584	0.366311	0.371772	0.377126	0.377568	0.382739	0.388642	0.398385	0.407423	0.410106	0.410333	0.419886	0.412943	0.414494	0.414648	0.411133	0.408988	0.412973
csedlakii_ID952	Nitrogen	Glycine	H6	0.101839	0.107668	0.116793	0.126641	0.134094	0.138898	0.142758	0.145715	0.147575	0.151257	0.154915	0.158498	0.161774	0.165762	0.171191	0.175042	0.179356	0.183956	0.187316	0.192092	0.196783	0.202765	0.209431	0.216874	0.22335	0.230442	0.237589	0.244731	0.250138	0.254903	0.257973	0.259708	0.25696	0.252322	0.248017	0.246541	0.244488	0.244259	0.242759	0.242807	0.242496	0.242914	0.24199	0.241248	0.241601	0.241533
csedlakii_ID952	Nitrogen	Beta-Phenylethylamine	H7	0.104503	0.110619	0.11702	0.124643	0.129965	0.133861	0.136228	0.138285	0.140153	0.145316	0.147487	0.149154	0.149412	0.150717	0.152865	0.154413	0.156925	0.15758	0.156646	0.157015	0.157261	0.158044	0.159465	0.161973	0.16247	0.162937	0.164633	0.166247	0.166353	0.169382	0.171186	0.173035	0.17437	0.174458	0.177219	0.18386	0.188713	0.191341	0.193696	0.196754	0.195692	0.195423	0.191909	0.188512	0.184126	0.1818
csedlakii_ID952	Nitrogen	L-Proline	H8	0.100839	0.107748	0.11612	0.123871	0.130001	0.135573	0.14175	0.14597	0.150089	0.155482	0.162077	0.168525	0.17414	0.181476	0.189869	0.196426	0.204269	0.210113	0.214371	0.220272	0.226624	0.234878	0.243931	0.253241	0.260955	0.267851	0.276741	0.286846	0.29375	0.302221	0.309929	0.319508	0.325056	0.33605	0.343921	0.356493	0.365649	0.370625	0.375501	0.384144	0.389483	0.397529	0.398052	0.405133	0.405173	0.407375
csedlakii_ID952	Nitrogen	D-Methionine	H9	0.104934	0.1128	0.121218	0.130246	0.136419	0.140785	0.144803	0.148278	0.150944	0.154433	0.158165	0.161239	0.163845	0.16695	0.171129	0.174892	0.179368	0.182158	0.18255	0.184654	0.185863	0.188301	0.192329	0.19614	0.198757	0.200332	0.204493	0.207101	0.210809	0.215197	0.218407	0.22213	0.224468	0.227067	0.231514	0.236173	0.241282	0.244408	0.248415	0.25027	0.251001	0.253725	0.252258	0.252379	0.252107	0.252491
csedlakii_ID952	Nitrogen	Cytosine	H10	0.104774	0.109261	0.11974	0.127001	0.134268	0.138967	0.143114	0.147037	0.1496	0.152944	0.15559	0.157689	0.15983	0.161977	0.164832	0.167228	0.17041	0.171975	0.173296	0.176372	0.178806	0.181827	0.185232	0.189277	0.19206	0.19415	0.198429	0.200723	0.203983	0.207266	0.210575	0.213405	0.217176	0.21987	0.223283	0.226306	0.230885	0.233587	0.237469	0.240016	0.242413	0.244932	0.246289	0.249537	0.253035	0.255021
csedlakii_ID952	Nitrogen	D-Valine	H11	0.107356	0.110818	0.119317	0.125946	0.131025	0.135637	0.138692	0.141784	0.144663	0.148399	0.151424	0.153983	0.15666	0.160106	0.163493	0.167229	0.170617	0.172863	0.175411	0.179112	0.180543	0.183256	0.184999	0.186947	0.187607	0.186858	0.190443	0.189365	0.190749	0.191771	0.19204	0.192837	0.193465	0.192056	0.193262	0.193212	0.19349	0.192607	0.197171	0.195318	0.197282	0.198957	0.199139	0.201265	0.202827	0.204269
csedlakii_ID952	Nitrogen	N-Acetyl-D-Glucosamine	H12	0.103241	0.108856	0.119332	0.124449	0.130296	0.136698	0.143097	0.149852	0.155841	0.163166	0.169924	0.176985	0.183339	0.189549	0.195206	0.204121	0.21346	0.223359	0.236068	0.25213	0.27054	0.292087	0.319487	0.345074	0.382758	0.425638	0.453725	0.490449	0.501361	0.482907	0.463462	0.441051	0.424259	0.419095	0.4141	0.409038	0.403066	0.404829	0.402105	0.400662	0.401771	0.405345	0.403562	0.409052	0.412615	0.415745
csedlakii_ID773	Carbon	Propionate	A1	0.114805	0.105282	0.119702	0.122757	0.11689	0.11872	0.119763	0.120175	0.120964	0.121432	0.122007	0.123222	0.123874	0.124858	0.126708	0.12755	0.128958	0.130284	0.13193	0.133198	0.134232	0.135382	0.136765	0.137916	0.139276	0.139384	0.14035	0.141772	0.143114	0.144256	0.144165	0.144848	0.145927	0.147329	0.148246	0.148505	0.149798	0.151307	0.153242	0.155895	0.157761	0.159153	0.159973	0.160278	0.160398	0.160759
csedlakii_ID773	Carbon	L-Glutamic Acid	A2	0.114138	0.102095	0.120808	0.125844	0.127032	0.126533	0.127458	0.128323	0.129448	0.130587	0.131522	0.132774	0.134096	0.135064	0.136187	0.137631	0.13875	0.139707	0.141263	0.14247	0.143674	0.145209	0.146134	0.147284	0.148335	0.148834	0.149762	0.151291	0.152952	0.154973	0.155238	0.156193	0.157087	0.158653	0.158854	0.158117	0.159795	0.161669	0.163534	0.167109	0.167486	0.168894	0.168336	0.167302	0.167797	0.168282
csedlakii_ID773	Carbon	D-Glucose	A3	0.119604	0.107815	0.127815	0.136615	0.139803	0.139447	0.142437	0.145339	0.148425	0.151869	0.153629	0.155485	0.157275	0.158582	0.159115	0.159931	0.159833	0.159923	0.159739	0.159636	0.159429	0.159516	0.158832	0.15884	0.158238	0.157923	0.157852	0.157619	0.157466	0.15721	0.157033	0.156517	0.156504	0.156241	0.15577	0.155701	0.155455	0.155225	0.15502	0.155029	0.15497	0.154391	0.15416	0.154174	0.154105	0.15382
csedlakii_ID773	Carbon	Potassium Sorbate	A4	0.114039	0.103082	0.1208	0.128384	0.12684	0.122604	0.123236	0.123812	0.124673	0.124989	0.125065	0.125399	0.125491	0.125422	0.125033	0.125249	0.125083	0.124415	0.124258	0.124276	0.124085	0.123847	0.123622	0.123307	0.122978	0.122525	0.122176	0.122311	0.12216	0.121466	0.12174	0.121629	0.121304	0.121181	0.120993	0.121112	0.120629	0.120774	0.120934	0.120744	0.12089	0.120243	0.120491	0.120583	0.120581	0.120322
csedlakii_ID773	Carbon	Lactulose	A5	0.113507	0.0987367	0.111112	0.117761	0.116414	0.115312	0.115809	0.116162	0.116867	0.116711	0.117161	0.117223	0.117347	0.118041	0.118276	0.118679	0.118643	0.11898	0.119459	0.119692	0.119844	0.119985	0.12036	0.120741	0.120721	0.120814	0.120578	0.120821	0.121638	0.120834	0.120458	0.12108	0.120943	0.121129	0.121263	0.121234	0.121125	0.121322	0.122214	0.12268	0.123549	0.124023	0.124956	0.125961	0.127233	0.129169
csedlakii_ID773	Carbon	Glycerol	A6	0.111113	0.100669	0.113993	0.125041	0.127542	0.131307	0.135801	0.140213	0.144436	0.147428	0.150364	0.152568	0.154143	0.155739	0.156662	0.158064	0.158426	0.159245	0.160114	0.160698	0.161241	0.161329	0.162207	0.163175	0.163264	0.16364	0.164126	0.16481	0.16609	0.165891	0.166462	0.167439	0.167607	0.168008	0.168501	0.168702	0.169012	0.169678	0.170256	0.170815	0.171509	0.171356	0.171716	0.17219	0.172258	0.172641
csedlakii_ID773	Carbon	Myo-Inositol	A7	0.107374	0.0975238	0.110694	0.119794	0.119042	0.118856	0.119698	0.120567	0.121723	0.122268	0.123123	0.124416	0.125748	0.127293	0.128773	0.13078	0.132159	0.134518	0.13713	0.139252	0.141454	0.143112	0.145153	0.147207	0.148413	0.148989	0.150051	0.151166	0.152738	0.153375	0.154014	0.155075	0.155795	0.156648	0.15706	0.15732	0.158098	0.159013	0.159908	0.161108	0.16164	0.162008	0.162692	0.163111	0.163107	0.163925
csedlakii_ID773	Carbon	D-Serine	A8	0.117762	0.101846	0.114749	0.123573	0.126168	0.130229	0.134109	0.13791	0.140511	0.142885	0.143687	0.144585	0.145612	0.145912	0.146259	0.146031	0.146152	0.146219	0.146265	0.146249	0.145996	0.146733	0.146533	0.146561	0.146526	0.14701	0.146965	0.147175	0.14731	0.147353	0.147727	0.147769	0.148054	0.148613	0.148445	0.148635	0.14878	0.148794	0.149377	0.149602	0.149532	0.149779	0.149646	0.150443	0.150308	0.150295
csedlakii_ID773	Carbon	D-Galactose	A9	0.109148	0.102035	0.11798	0.125751	0.129498	0.133046	0.135948	0.13849	0.141601	0.144458	0.146713	0.148127	0.150279	0.151828	0.15263	0.154393	0.155479	0.156272	0.157081	0.157995	0.158382	0.159295	0.160124	0.160602	0.16125	0.161741	0.162016	0.162623	0.163061	0.163153	0.16341	0.163595	0.163703	0.163899	0.164554	0.164597	0.164516	0.164397	0.1648	0.165444	0.165425	0.165449	0.165545	0.165519	0.165719	0.165548
csedlakii_ID773	Carbon	Oxalic Acid	A10	0.106279	0.094749	0.106439	0.105988	0.105773	0.104599	0.104955	0.105377	0.106055	0.106906	0.107666	0.107632	0.108302	0.108282	0.108599	0.108686	0.109034	0.109681	0.111211	0.111671	0.111026	0.111984	0.112811	0.113938	0.113766	0.113053	0.113589	0.113863	0.114517	0.114472	0.112263	0.114034	0.114123	0.113928	0.113905	0.112962	0.112399	0.112674	0.11364	0.114516	0.114921	0.11462	0.114475	0.114072	0.113785	0.113004
csedlakii_ID773	Carbon	Malic Acid	A11	0.105393	0.0998833	0.109258	0.111636	0.111892	0.112232	0.114734	0.116303	0.118881	0.121266	0.123202	0.12562	0.128477	0.131343	0.134413	0.13678	0.138959	0.140731	0.14265	0.143681	0.144503	0.143893	0.145141	0.145814	0.146038	0.145561	0.145971	0.146459	0.147312	0.148025	0.147469	0.147803	0.147478	0.147706	0.14697	0.145623	0.144489	0.145271	0.147432	0.149468	0.150696	0.150751	0.150506	0.150595	0.148857	0.149947
csedlakii_ID773	Carbon	L-Methionine	A12	0.111983	0.100135	0.101409	0.104384	0.103084	0.102253	0.101937	0.101721	0.101966	0.100912	0.101854	0.101248	0.100999	0.101496	0.101023	0.101231	0.101263	0.100925	0.101122	0.100836	0.101076	0.101179	0.101332	0.101963	0.101196	0.101776	0.100833	0.10104	0.100805	0.10068	0.101226	0.100625	0.10087	0.10112	0.100726	0.100821	0.101034	0.101141	0.101003	0.101926	0.102587	0.102036	0.102037	0.101917	0.101823	0.101866
csedlakii_ID773	Carbon	Glycine	B1	0.108659	0.0978635	0.117777	0.122256	0.123811	0.121647	0.121483	0.121926	0.122116	0.122239	0.122367	0.122838	0.122767	0.122544	0.122704	0.122545	0.122383	0.122474	0.12254	0.122351	0.121792	0.122264	0.122139	0.121726	0.121926	0.121685	0.121816	0.121441	0.121438	0.121912	0.121184	0.121375	0.121527	0.121305	0.1219	0.121082	0.121254	0.12163	0.122378	0.122316	0.122057	0.122043	0.122028	0.121956	0.121908	0.122039
csedlakii_ID773	Carbon	Negative Control	B2	0.11126	0.0986235	0.11786	0.125004	0.125715	0.124303	0.124101	0.124636	0.124269	0.124276	0.124329	0.124857	0.124356	0.124391	0.123973	0.124085	0.122814	0.123074	0.122438	0.12233	0.121452	0.122384	0.121386	0.12126	0.120989	0.120448	0.120845	0.120659	0.119875	0.120448	0.11902	0.118941	0.120016	0.118709	0.119334	0.118526	0.118467	0.119183	0.119071	0.119528	0.118453	0.117922	0.116977	0.11787	0.116982	0.116425
csedlakii_ID773	Carbon	Quinate	B3	0.107865	0.109388	0.115694	0.116558	0.117114	0.115048	0.114817	0.114582	0.113836	0.114062	0.114054	0.113466	0.113091	0.113053	0.112368	0.112685	0.111926	0.111925	0.111809	0.111761	0.111187	0.11123	0.111103	0.111007	0.110563	0.110472	0.110724	0.110205	0.110378	0.110154	0.109988	0.109703	0.110056	0.109637	0.109012	0.109322	0.108718	0.109142	0.108852	0.109412	0.109793	0.109768	0.109499	0.109632	0.109379	0.109021
csedlakii_ID773	Carbon	Succinate	B4	0.114599	0.107392	0.12067	0.12983	0.130304	0.128276	0.130413	0.131446	0.131174	0.133468	0.135511	0.137042	0.139218	0.14159	0.143302	0.145786	0.148315	0.150592	0.153946	0.157088	0.15906	0.16049	0.163145	0.166048	0.168408	0.170111	0.171605	0.1742	0.176787	0.179879	0.182175	0.184469	0.186968	0.187806	0.190632	0.192485	0.192413	0.192399	0.195709	0.200752	0.205826	0.209132	0.211792	0.213723	0.214415	0.216777
csedlakii_ID773	Carbon	Dulcitol	B5	0.107628	0.102602	0.115305	0.124358	0.123348	0.119705	0.120155	0.119341	0.118485	0.11912	0.120071	0.121027	0.121784	0.122694	0.123403	0.124884	0.125911	0.127641	0.129408	0.130559	0.131916	0.133132	0.134194	0.136205	0.137041	0.13845	0.138884	0.1402	0.141728	0.143208	0.143887	0.145407	0.146421	0.147426	0.149	0.14913	0.14957	0.149538	0.151086	0.153246	0.156214	0.156989	0.158186	0.159103	0.159513	0.160116
csedlakii_ID773	Carbon	Alpha-D-Glucose	B6	0.118466	0.117563	0.127257	0.139331	0.14256	0.142652	0.145427	0.148083	0.150105	0.153707	0.15688	0.158508	0.160183	0.160885	0.16168	0.16233	0.162657	0.162316	0.162139	0.161924	0.161718	0.161378	0.160874	0.161169	0.160792	0.160703	0.159898	0.159623	0.159432	0.159088	0.158258	0.158375	0.158358	0.158271	0.158126	0.157876	0.157773	0.15721	0.157331	0.157196	0.157021	0.156591	0.156348	0.156315	0.15605	0.15622
csedlakii_ID773	Carbon	L-Xylose	B7	0.108928	0.107358	0.11514	0.12339	0.123598	0.120848	0.120489	0.120331	0.118363	0.117638	0.11792	0.118349	0.118509	0.117252	0.117298	0.116817	0.116356	0.116756	0.116739	0.116439	0.116922	0.116586	0.116803	0.117529	0.116941	0.117686	0.116874	0.117154	0.116418	0.116748	0.116993	0.116906	0.117257	0.117029	0.117363	0.117092	0.117128	0.116624	0.116948	0.11783	0.118191	0.118186	0.118263	0.118033	0.118055	0.117673
csedlakii_ID773	Carbon	L-Aspartic Acid	B8	0.108797	0.104886	0.116665	0.120671	0.121727	0.121734	0.122649	0.123387	0.123869	0.124753	0.126087	0.127432	0.128564	0.129097	0.129903	0.131676	0.132391	0.134161	0.135808	0.13746	0.138904	0.140131	0.1419	0.144093	0.145471	0.147225	0.14783	0.149343	0.150788	0.152707	0.153566	0.155791	0.156738	0.157994	0.159964	0.160461	0.160632	0.160324	0.162446	0.16535	0.168542	0.169483	0.17089	0.17208	0.172671	0.173215
csedlakii_ID773	Carbon	D-Fructose	B9	0.108632	0.111474	0.12309	0.130926	0.133865	0.135164	0.137316	0.139433	0.141582	0.143387	0.145756	0.147234	0.149513	0.150409	0.150507	0.152542	0.152885	0.15379	0.154637	0.155603	0.156288	0.156394	0.156824	0.157517	0.157806	0.158406	0.157918	0.15817	0.157428	0.157642	0.157197	0.15809	0.15795	0.157983	0.158361	0.158233	0.158211	0.157601	0.156825	0.156983	0.157014	0.156457	0.156716	0.156469	0.157125	0.156631
csedlakii_ID773	Carbon	L-Valine	B10	0.108562	0.105356	0.111661	0.117779	0.117825	0.11591	0.115311	0.115014	0.113534	0.113433	0.113416	0.113109	0.113758	0.112893	0.111916	0.113049	0.112448	0.112412	0.113104	0.113243	0.112846	0.112861	0.113047	0.11322	0.113288	0.113969	0.112324	0.112614	0.111845	0.111431	0.111136	0.111947	0.111672	0.111406	0.111929	0.111547	0.11158	0.110824	0.110102	0.110405	0.110763	0.110201	0.110524	0.110255	0.110585	0.110022
csedlakii_ID773	Carbon	Pyruvate	B11	0.111437	0.108953	0.111404	0.122364	0.1255	0.126123	0.128387	0.130993	0.132601	0.134861	0.136836	0.137929	0.139888	0.140989	0.141121	0.142918	0.144218	0.144681	0.145812	0.146543	0.146263	0.147576	0.14808	0.149171	0.14975	0.150739	0.149426	0.150392	0.150184	0.150619	0.15079	0.151456	0.151802	0.151779	0.152334	0.152547	0.15319	0.153045	0.153749	0.153755	0.154595	0.154776	0.154363	0.154623	0.154952	0.154764
csedlakii_ID773	Carbon	Lactate	B12	0.111607	0.100773	0.102741	0.109864	0.109668	0.11295	0.116934	0.12214	0.126345	0.129584	0.13341	0.135632	0.138963	0.141075	0.142858	0.144763	0.14774	0.148598	0.150015	0.151652	0.151752	0.152812	0.15378	0.155255	0.155781	0.156821	0.156802	0.157437	0.157192	0.158624	0.158363	0.159197	0.158946	0.159838	0.159879	0.160331	0.160264	0.159952	0.160491	0.160891	0.161461	0.161152	0.161215	0.161818	0.161369	0.162011
csedlakii_ID773	Carbon	Citric Acid	C1	0.107482	0.0990357	0.109044	0.111087	0.111877	0.114176	0.115906	0.117434	0.1193	0.120571	0.121155	0.122578	0.123406	0.125098	0.126412	0.127371	0.128551	0.12988	0.131353	0.132478	0.13239	0.132371	0.132376	0.131777	0.131896	0.131203	0.130875	0.131671	0.133462	0.13455	0.134617	0.134876	0.135331	0.135188	0.135573	0.135219	0.135426	0.13647	0.138939	0.14134	0.142265	0.143171	0.143106	0.142136	0.141136	0.140226
csedlakii_ID773	Carbon	D-Mannose	C2	0.110046	0.112671	0.125619	0.134095	0.137715	0.139498	0.141821	0.144257	0.14766	0.151436	0.155106	0.158579	0.160531	0.163559	0.165951	0.166608	0.167629	0.168065	0.168992	0.169063	0.169712	0.169829	0.169382	0.169766	0.169591	0.169801	0.169622	0.169409	0.168536	0.168943	0.167926	0.168534	0.168484	0.168098	0.168601	0.167811	0.167887	0.168085	0.16759	0.167602	0.167209	0.166897	0.166361	0.166429	0.166208	0.165658
csedlakii_ID773	Carbon	L-Serine	C3	0.107033	0.10895	0.117908	0.12322	0.124718	0.124532	0.127072	0.12906	0.131007	0.133762	0.136832	0.13882	0.141735	0.14435	0.14659	0.149331	0.151754	0.154263	0.157428	0.16087	0.163859	0.167279	0.16957	0.172986	0.175207	0.17838	0.181124	0.18388	0.186269	0.189377	0.191717	0.194434	0.197735	0.199477	0.202203	0.203693	0.206451	0.208215	0.210862	0.21412	0.21587	0.218012	0.21999	0.221238	0.223119	0.224195
csedlakii_ID773	Carbon	Salicoside	C4	0.109633	0.111711	0.124419	0.129783	0.12866	0.126873	0.127666	0.12802	0.127204	0.129272	0.130887	0.131157	0.13108	0.131595	0.13029	0.131097	0.130947	0.130338	0.130836	0.131009	0.131445	0.132112	0.13137	0.13305	0.132412	0.133126	0.134302	0.133855	0.134051	0.133718	0.13363	0.134106	0.134709	0.134351	0.135255	0.133612	0.133309	0.133412	0.134059	0.134197	0.134426	0.134704	0.134129	0.134739	0.134508	0.134776
csedlakii_ID773	Carbon	Cellobiose	C5	0.113869	0.116649	0.124699	0.1299	0.128286	0.125984	0.125439	0.124636	0.122741	0.123582	0.125071	0.12579	0.126222	0.127484	0.127471	0.128321	0.129526	0.130028	0.131715	0.132533	0.134632	0.135811	0.136114	0.138812	0.140009	0.140477	0.141674	0.142971	0.144632	0.145061	0.146704	0.147317	0.149359	0.150802	0.152206	0.15299	0.154326	0.15522	0.1577	0.159462	0.160678	0.161704	0.162194	0.163531	0.164534	0.166606
csedlakii_ID773	Carbon	Adonitol	C6	0.106912	0.107094	0.117637	0.123517	0.122141	0.119479	0.119173	0.1179	0.115176	0.115643	0.116921	0.116979	0.116819	0.116946	0.116846	0.116019	0.116701	0.116742	0.117294	0.117097	0.11866	0.118807	0.118417	0.120213	0.120465	0.120153	0.120321	0.120452	0.120738	0.120605	0.120697	0.12084	0.121948	0.121999	0.122442	0.123649	0.123934	0.124016	0.125964	0.126837	0.127555	0.127428	0.127917	0.128275	0.128627	0.130173
csedlakii_ID773	Carbon	D-Glucose-6-Phosphate	C7	0.110108	0.114527	0.123676	0.125876	0.126682	0.128246	0.131761	0.139137	0.148963	0.163764	0.182996	0.214655	0.263936	0.361614	0.46317	0.495154	0.506406	0.508358	0.524824	0.544955	0.558354	0.578913	0.590925	0.601951	0.609361	0.620418	0.624335	0.629784	0.63271	0.636698	0.639201	0.645708	0.65083	0.652213	0.662427	0.667368	0.671525	0.676091	0.688093	0.698978	0.71132	0.723682	0.724656	0.737381	0.750742	0.754737
csedlakii_ID773	Carbon	L-Sorbose	C8	0.107265	0.10731	0.116916	0.120407	0.11876	0.116897	0.115632	0.113788	0.111666	0.111018	0.111906	0.111905	0.111485	0.110901	0.110584	0.110453	0.110465	0.110369	0.110676	0.110342	0.109868	0.110766	0.110952	0.111595	0.111515	0.112095	0.112417	0.111937	0.112614	0.112341	0.112652	0.113086	0.11304	0.113763	0.113573	0.113447	0.114733	0.11455	0.115553	0.116144	0.115794	0.115254	0.115516	0.11596	0.116236	0.116556
csedlakii_ID773	Carbon	D-Arabitol	C9	0.0908142	0.0906641	0.102029	0.107035	0.106151	0.105222	0.103973	0.102751	0.100607	0.100809	0.101535	0.10143	0.101473	0.100376	0.0991458	0.0996818	0.0990495	0.0994548	0.0990794	0.0991741	0.0983716	0.0987861	0.0986778	0.0990869	0.098973	0.0995324	0.098882	0.098291	0.0979932	0.0974925	0.0974284	0.0981856	0.0977681	0.0977555	0.0979954	0.0980505	0.0982304	0.0974961	0.0982315	0.0984054	0.0984479	0.097662	0.097969	0.0984393	0.0982754	0.0981007
csedlakii_ID773	Carbon	L-Lysine	C10	0.108196	0.108502	0.114543	0.119232	0.11859	0.117499	0.116227	0.115256	0.1129	0.113399	0.113033	0.11291	0.113599	0.11237	0.111272	0.112077	0.111651	0.111378	0.111918	0.112149	0.11223	0.113021	0.112793	0.113288	0.113416	0.114596	0.112882	0.113164	0.112748	0.112726	0.112549	0.113443	0.113432	0.114272	0.113918	0.114437	0.115409	0.114917	0.115058	0.115128	0.114802	0.114065	0.114428	0.114717	0.115162	0.115139
csedlakii_ID773	Carbon	Trehalose	C11	0.109616	0.116725	0.114898	0.127982	0.130745	0.132061	0.133211	0.134678	0.135974	0.138474	0.139826	0.141677	0.142263	0.142529	0.142156	0.143049	0.143127	0.142866	0.143865	0.145376	0.144729	0.145685	0.146505	0.146524	0.146602	0.147468	0.145455	0.145962	0.145046	0.145345	0.145874	0.146363	0.146554	0.145956	0.146464	0.147056	0.147249	0.146266	0.145567	0.14536	0.146439	0.146229	0.146485	0.147656	0.148277	0.147936
csedlakii_ID773	Carbon	Acetic Acid	C12	0.108544	0.101307	0.10326	0.110056	0.106044	0.104901	0.10619	0.108437	0.112771	0.112087	0.114257	0.116797	0.119497	0.122708	0.124896	0.127041	0.130548	0.132592	0.135612	0.13857	0.140733	0.144034	0.14649	0.149254	0.151847	0.154717	0.155419	0.158	0.160299	0.16282	0.164462	0.16748	0.169115	0.170924	0.172887	0.176938	0.179236	0.181091	0.183226	0.183488	0.186326	0.188871	0.190652	0.195063	0.195092	0.198724
csedlakii_ID773	Carbon	L-Alanine	D1	0.107364	0.0995808	0.116752	0.122623	0.123458	0.123275	0.12134	0.12076	0.121439	0.121769	0.122466	0.12264	0.123466	0.123697	0.124355	0.124776	0.125777	0.126892	0.128058	0.128881	0.12956	0.130822	0.132004	0.133268	0.134488	0.136182	0.13732	0.138816	0.140292	0.141749	0.143056	0.144488	0.145492	0.146586	0.147689	0.148442	0.148839	0.149827	0.15087	0.151594	0.15241	0.153009	0.153683	0.153964	0.153882	0.154511
csedlakii_ID773	Carbon	L-Arabinose	D2	0.106813	0.101785	0.119395	0.128493	0.132686	0.135621	0.139393	0.142916	0.146082	0.149126	0.152694	0.155284	0.15778	0.160678	0.162995	0.164657	0.166752	0.168748	0.171129	0.17254	0.173803	0.175094	0.176278	0.177062	0.177665	0.17847	0.178672	0.178868	0.179175	0.180592	0.180318	0.181138	0.181264	0.180915	0.182066	0.181352	0.180237	0.180052	0.180079	0.180943	0.180964	0.181193	0.181631	0.181058	0.180423	0.180295
csedlakii_ID773	Carbon	L-Threonine	D3	0.110304	0.10961	0.115953	0.121951	0.122291	0.12041	0.119854	0.120133	0.119441	0.119556	0.120096	0.119472	0.119431	0.119484	0.11826	0.118124	0.118185	0.117068	0.117311	0.117219	0.116989	0.117056	0.116597	0.117009	0.116023	0.11548	0.11591	0.114968	0.115047	0.115051	0.114458	0.114917	0.115395	0.114718	0.11559	0.113829	0.113383	0.114258	0.11445	0.114998	0.114927	0.114989	0.114443	0.114613	0.114323	0.115143
csedlakii_ID773	Carbon	4 Hydroxy-Phenylacetate	D4	0.107692	0.104933	0.114901	0.116599	0.116022	0.114946	0.113851	0.112873	0.111969	0.112336	0.112424	0.111752	0.111328	0.111347	0.110574	0.110774	0.110551	0.110298	0.110059	0.110038	0.110866	0.110856	0.110478	0.111274	0.11112	0.111319	0.111494	0.111196	0.11102	0.11145	0.110962	0.111645	0.11243	0.11204	0.113086	0.113165	0.113009	0.112881	0.113502	0.113894	0.114348	0.114606	0.115002	0.115497	0.116046	0.116224
csedlakii_ID773	Carbon	D-Ribose	D5	0.109608	0.112446	0.123414	0.127492	0.128303	0.128779	0.130378	0.132917	0.134454	0.137946	0.14242	0.14456	0.146619	0.149153	0.149779	0.150746	0.151883	0.15178	0.153076	0.15293	0.154682	0.155492	0.155564	0.156843	0.157469	0.157229	0.158453	0.15854	0.159134	0.159489	0.159778	0.160304	0.161532	0.161414	0.162529	0.162734	0.162541	0.16296	0.164405	0.164688	0.164735	0.16539	0.165614	0.165852	0.165731	0.166302
csedlakii_ID773	Carbon	Melibiose	D6	0.109089	0.109618	0.124177	0.12775	0.127666	0.127079	0.127577	0.128947	0.130156	0.132936	0.136605	0.139372	0.141883	0.145086	0.147411	0.149447	0.151562	0.152555	0.154345	0.155548	0.158169	0.159545	0.159878	0.161781	0.16338	0.163623	0.165552	0.165715	0.166421	0.166932	0.167682	0.169212	0.170264	0.170604	0.171818	0.173	0.173049	0.172932	0.174195	0.175108	0.175324	0.175235	0.175859	0.176195	0.177041	0.178021
csedlakii_ID773	Carbon	D-Alanine	D7	0.107525	0.108226	0.121541	0.126113	0.125694	0.125253	0.125114	0.125524	0.125214	0.126657	0.129663	0.131568	0.133004	0.135456	0.136452	0.137778	0.139282	0.140655	0.142194	0.143753	0.145911	0.147892	0.149029	0.151136	0.152282	0.152654	0.155134	0.155303	0.156457	0.156992	0.157699	0.159161	0.16083	0.161063	0.162417	0.164479	0.163841	0.16319	0.164853	0.166482	0.167055	0.16725	0.167985	0.168208	0.169008	0.171205
csedlakii_ID773	Carbon	L-Fucose	D8	0.109398	0.10925	0.123452	0.127841	0.126745	0.125521	0.12528	0.124962	0.124146	0.124802	0.126605	0.127467	0.128269	0.129628	0.130154	0.131409	0.132346	0.133239	0.134156	0.136164	0.137362	0.139473	0.140722	0.141892	0.143305	0.144463	0.145825	0.14596	0.147233	0.148054	0.148878	0.150248	0.151747	0.151833	0.153081	0.15417	0.153474	0.152414	0.152605	0.153614	0.154141	0.152641	0.153693	0.154123	0.154461	0.154607
csedlakii_ID773	Carbon	L-Asparagine	D9	0.105186	0.1053	0.120046	0.125361	0.125429	0.125698	0.125981	0.126586	0.126772	0.128437	0.130808	0.13209	0.133449	0.134711	0.135392	0.136981	0.13858	0.140116	0.14159	0.143531	0.144786	0.147189	0.14955	0.151482	0.153325	0.156026	0.158389	0.159468	0.161434	0.163246	0.164631	0.166893	0.169054	0.170558	0.172188	0.174112	0.173925	0.174333	0.175424	0.176589	0.178382	0.177811	0.179347	0.18	0.180133	0.180605
csedlakii_ID773	Carbon	L-Leucine	D10	0.107261	0.106584	0.11583	0.121105	0.119778	0.119524	0.118562	0.116349	0.11442	0.11512	0.115423	0.115195	0.114772	0.113868	0.112873	0.113115	0.112983	0.112836	0.112535	0.112824	0.112157	0.11319	0.112797	0.113249	0.112709	0.11402	0.113408	0.112386	0.112242	0.111946	0.111692	0.111847	0.111768	0.111909	0.111727	0.11182	0.112017	0.111348	0.111463	0.111315	0.111181	0.110168	0.110094	0.110353	0.110119	0.109946
csedlakii_ID773	Carbon	D-Aspartic Acid	D11	0.109095	0.106952	0.111168	0.118872	0.11748	0.116293	0.114929	0.113807	0.112715	0.112716	0.112715	0.113003	0.112136	0.110784	0.111066	0.11096	0.11086	0.10997	0.110568	0.110993	0.110817	0.111356	0.112089	0.110722	0.111613	0.111986	0.111463	0.110981	0.110366	0.110793	0.111477	0.111704	0.11115	0.111786	0.110688	0.111776	0.112044	0.112526	0.111103	0.111157	0.110406	0.110058	0.110122	0.11173	0.112024	0.112582
csedlakii_ID773	Carbon	Inosine	D12	0.11036	0.103465	0.110138	0.123643	0.124043	0.123964	0.127337	0.130191	0.13353	0.135979	0.138639	0.140882	0.143323	0.145121	0.147302	0.14828	0.149332	0.149802	0.150037	0.150665	0.150889	0.151589	0.152	0.152336	0.152142	0.152451	0.152733	0.152326	0.152517	0.1524	0.15245	0.152242	0.152342	0.152081	0.151942	0.152108	0.152112	0.152181	0.152064	0.151908	0.151886	0.151292	0.151433	0.151518	0.150952	0.151118
csedlakii_ID773	Carbon	Thymidine	E1	0.112999	0.105827	0.125857	0.136031	0.14149	0.145523	0.14745	0.149795	0.152295	0.155212	0.158101	0.16022	0.162917	0.165105	0.167007	0.168486	0.170644	0.172263	0.174548	0.175239	0.176417	0.176782	0.177345	0.178341	0.178563	0.179083	0.178744	0.179716	0.180565	0.180978	0.181445	0.181848	0.182389	0.255533	0.255221	0.252462	0.249058	0.244756	0.23757	0.227152	0.210919	0.192701	0.180129	0.173107	0.171283	0.170752
csedlakii_ID773	Carbon	Sucrose	E2	0.109141	0.110314	0.115222	0.125211	0.131094	0.134112	0.136097	0.138989	0.142729	0.14682	0.149448	0.151163	0.153532	0.15614	0.157916	0.159677	0.161916	0.163514	0.166155	0.166691	0.167747	0.167722	0.168339	0.169221	0.169306	0.16899	0.168707	0.170258	0.17202	0.173417	0.174125	0.173721	0.173414	0.226652	0.226502	0.224414	0.223853	0.221056	0.213162	0.198025	0.179111	0.172211	0.167419	0.164714	0.164783	0.163911
csedlakii_ID773	Carbon	D-Xylose	E3	0.109856	0.107995	0.115539	0.123125	0.124159	0.125094	0.128379	0.133303	0.137183	0.143067	0.14908	0.153928	0.160868	0.167979	0.171672	0.176458	0.18106	0.183591	0.187198	0.190074	0.193897	0.196818	0.199239	0.202068	0.204139	0.206468	0.208495	0.211357	0.212584	0.21461	0.216825	0.219311	0.22079	0.222784	0.22464	0.225335	0.226505	0.227741	0.229385	0.231233	0.232756	0.234186	0.235201	0.236008	0.236816	0.238749
csedlakii_ID773	Carbon	L-Cysteine	E4	0.112711	0.111055	0.117279	0.123389	0.121675	0.119932	0.119341	0.119238	0.11665	0.116823	0.117755	0.117238	0.117615	0.119279	0.117837	0.1191	0.119629	0.119378	0.11978	0.119876	0.120473	0.121362	0.121503	0.122616	0.122644	0.122078	0.123179	0.123778	0.12347	0.12326	0.12355	0.123668	0.12488	0.124571	0.12509	0.123881	0.123601	0.124854	0.125508	0.126379	0.12615	0.126524	0.125659	0.125237	0.125581	0.125776
csedlakii_ID773	Carbon	Alpha-D-Lactose	E5	0.10795	0.107573	0.116828	0.121373	0.120739	0.119712	0.117892	0.117925	0.11815	0.11835	0.120172	0.1202	0.120861	0.122649	0.122794	0.123826	0.124878	0.125093	0.126239	0.126085	0.127182	0.128135	0.128548	0.129973	0.13031	0.129826	0.131455	0.131963	0.133042	0.133036	0.133823	0.134334	0.135628	0.135327	0.136487	0.136307	0.13645	0.138163	0.139997	0.141298	0.141369	0.141897	0.141949	0.142052	0.142491	0.1431
csedlakii_ID773	Carbon	Raffinose	E6	0.11199	0.113789	0.12619	0.133069	0.135105	0.135684	0.133318	0.134121	0.135284	0.136407	0.138324	0.139554	0.140267	0.142219	0.143004	0.143686	0.14429	0.144246	0.144914	0.144489	0.145534	0.146044	0.146921	0.147933	0.149375	0.149015	0.150595	0.151072	0.151925	0.151444	0.151898	0.152434	0.152747	0.151919	0.151765	0.151538	0.151398	0.151666	0.152383	0.152103	0.15121	0.150755	0.150159	0.150107	0.149712	0.150232
csedlakii_ID773	Carbon	D-Asparagine	E7	0.105089	0.104767	0.115694	0.119408	0.118033	0.116602	0.114411	0.112867	0.111175	0.109967	0.111159	0.110813	0.110257	0.111091	0.110474	0.110186	0.110175	0.109943	0.110082	0.110357	0.1112	0.111873	0.111396	0.112167	0.112881	0.111765	0.113596	0.113107	0.113503	0.113059	0.11346	0.114082	0.11506	0.114555	0.115181	0.115949	0.115516	0.115971	0.117178	0.11828	0.117634	0.117468	0.117268	0.117296	0.117909	0.118929
csedlakii_ID773	Carbon	Erythritol	E8	0.11264	0.112226	0.122498	0.126151	0.125066	0.123786	0.12218	0.121417	0.120669	0.119988	0.121554	0.121987	0.122059	0.123224	0.122615	0.122657	0.123351	0.122824	0.123313	0.123425	0.12387	0.125191	0.124791	0.125654	0.125789	0.125327	0.126867	0.126429	0.127144	0.126141	0.126942	0.12658	0.127492	0.127527	0.127393	0.127562	0.128247	0.128868	0.129685	0.130318	0.129155	0.127779	0.127485	0.127493	0.128086	0.128686
csedlakii_ID773	Carbon	D-Cysteine	E9	0.112165	0.109834	0.118375	0.119639	0.117958	0.116477	0.11511	0.114308	0.113609	0.113539	0.113796	0.113722	0.113444	0.113337	0.113034	0.113002	0.11347	0.113417	0.113223	0.113639	0.113352	0.114287	0.114432	0.114589	0.114705	0.114986	0.115787	0.115659	0.116061	0.115926	0.116398	0.11635	0.116537	0.117467	0.117325	0.11754	0.118907	0.118768	0.119136	0.119526	0.118786	0.117918	0.117837	0.118088	0.118577	0.118833
csedlakii_ID773	Carbon	L-Isoleucine	E10	0.107909	0.10681	0.116183	0.12106	0.11995	0.118646	0.117049	0.115526	0.114346	0.114651	0.115431	0.115061	0.115417	0.114701	0.113577	0.114341	0.114577	0.114249	0.113988	0.113833	0.113715	0.114559	0.114535	0.114826	0.115021	0.115643	0.115524	0.115665	0.115687	0.115807	0.115928	0.116287	0.116853	0.117183	0.116741	0.116926	0.117759	0.118147	0.119064	0.118719	0.118574	0.117898	0.118014	0.118065	0.118392	0.118767
csedlakii_ID773	Carbon	L-Cysteic Acid	E11	0.107516	0.105339	0.10908	0.116019	0.114502	0.113411	0.112318	0.111253	0.111095	0.11007	0.109648	0.109583	0.109239	0.108195	0.107939	0.108095	0.108242	0.107915	0.107331	0.107174	0.106732	0.107078	0.107002	0.107093	0.106608	0.10694	0.107194	0.106866	0.10669	0.106631	0.106925	0.107147	0.106828	0.106896	0.106584	0.106815	0.107015	0.107379	0.107718	0.107527	0.107925	0.107434	0.107237	0.107703	0.107144	0.107721
csedlakii_ID773	Carbon	Adenosine	E12	0.110092	0.106164	0.112228	0.122605	0.126176	0.130394	0.142374	0.156883	0.165479	0.174317	0.188877	0.209611	0.231391	0.261226	0.285231	0.311133	0.32496	0.351041	0.370544	0.386361	0.410237	0.427799	0.439759	0.453192	0.462424	0.466866	0.462571	0.466328	0.464396	0.463789	0.467659	0.450198	0.459953	0.457375	0.460558	0.459756	0.458976	0.451835	0.454838	0.454537	0.45564	0.457853	0.453296	0.456051	0.447815	0.435224
csedlakii_ID773	Carbon	Xylitol	F1	0.108332	0.100466	0.120102	0.129972	0.132486	0.132912	0.131183	0.131042	0.131191	0.132268	0.132098	0.131673	0.132382	0.132519	0.131938	0.131356	0.13143	0.131822	0.132443	0.130854	0.131238	0.130655	0.129986	0.13131	0.130121	0.129828	0.130271	0.130217	0.130631	0.130329	0.130445	0.130494	0.130693	0.130901	0.130484	0.129553	0.129545	0.130182	0.130433	0.131554	0.130841	0.130843	0.130815	0.130855	0.130846	0.13099
csedlakii_ID773	Carbon	L-Glutamine	F2	0.104004	0.0982764	0.114485	0.125805	0.129808	0.133795	0.137943	0.143463	0.145637	0.148785	0.149629	0.151524	0.155729	0.159214	0.159387	0.161626	0.165319	0.168286	0.172645	0.173459	0.17711	0.179886	0.182251	0.187569	0.188899	0.190787	0.194191	0.19814	0.201609	0.204393	0.208081	0.209991	0.212291	0.215354	0.21747	0.215616	0.216567	0.215945	0.219332	0.224822	0.228701	0.230642	0.232841	0.232732	0.231833	0.233567
csedlakii_ID773	Carbon	L-Rhamnose	F3	0.108837	0.107834	0.110587	0.122288	0.123388	0.124368	0.126233	0.129039	0.130758	0.133951	0.137295	0.1396	0.14401	0.149832	0.151974	0.156433	0.161635	0.166375	0.171899	0.17668	0.181261	0.185877	0.190177	0.19583	0.199853	0.203631	0.207836	0.212628	0.215537	0.219563	0.223271	0.225732	0.228532	0.230137	0.233908	0.234157	0.235559	0.234051	0.236707	0.241739	0.246823	0.249232	0.251301	0.253649	0.252865	0.2558
csedlakii_ID773	Carbon	Putrescine	F4	0.109417	0.109036	0.10969	0.121151	0.121188	0.1203	0.119579	0.119705	0.11983	0.120453	0.120048	0.119169	0.119952	0.1215	0.119432	0.120347	0.120933	0.120583	0.120278	0.120169	0.120922	0.121763	0.121403	0.122368	0.122387	0.121928	0.123792	0.124261	0.124592	0.124508	0.124872	0.125147	0.126062	0.126038	0.126582	0.125818	0.12555	0.125443	0.126736	0.129014	0.1302	0.130461	0.130641	0.130854	0.131366	0.132329
csedlakii_ID773	Carbon	2 Deoxy-D-Ribose	F5	0.107469	0.108212	0.112509	0.124708	0.123847	0.122792	0.122384	0.122768	0.123798	0.123448	0.124552	0.123127	0.123264	0.125058	0.123854	0.123719	0.124336	0.123994	0.124462	0.123469	0.12382	0.12427	0.123674	0.123838	0.124095	0.122232	0.125455	0.123952	0.124225	0.123712	0.124303	0.124178	0.125325	0.12424	0.12415	0.125251	0.124145	0.125312	0.1266	0.128735	0.127297	0.127657	0.127468	0.128113	0.128551	0.128284
csedlakii_ID773	Carbon	L-Arabitol	F6	0.108867	0.111772	0.114988	0.124518	0.124038	0.123354	0.121473	0.122235	0.121747	0.12043	0.121762	0.121339	0.120973	0.121945	0.120075	0.119016	0.119846	0.118682	0.119754	0.118796	0.119744	0.120843	0.120922	0.122222	0.1235	0.122658	0.126066	0.125753	0.127074	0.127126	0.127891	0.128822	0.130591	0.128166	0.12996	0.131519	0.129832	0.129118	0.130944	0.132766	0.132305	0.133173	0.13303	0.13316	0.13247	0.133185
csedlakii_ID773	Carbon	D-Glucosamine	F7	0.109659	0.114442	0.121383	0.129797	0.132087	0.134192	0.134971	0.136578	0.138097	0.139551	0.142895	0.144853	0.146185	0.14843	0.149555	0.151363	0.152419	0.152365	0.153081	0.153061	0.153877	0.154395	0.154359	0.154878	0.153994	0.15319	0.154347	0.153725	0.153818	0.153521	0.15355	0.153741	0.154079	0.153312	0.153743	0.154266	0.153478	0.1537	0.153961	0.15426	0.153807	0.153598	0.153305	0.153209	0.153166	0.153387
csedlakii_ID773	Carbon	L-Phenylalanine	F8	0.111804	0.111813	0.120527	0.131972	0.126758	0.127701	0.124354	0.125579	0.125469	0.128636	0.128865	0.129235	0.13358	0.135241	0.130395	0.133742	0.133335	0.12804	0.128053	0.129023	0.130337	0.131556	0.131293	0.130717	0.132227	0.13055	0.136196	0.134645	0.134549	0.134974	0.130696	0.132094	0.131439	0.130642	0.132343	0.132582	0.132714	0.130625	0.130442	0.130904	0.134143	0.129962	0.13108	0.129621	0.130141	0.12966
csedlakii_ID773	Carbon	D-Glutamic Acid	F9	0.108014	0.109347	0.112397	0.116213	0.115772	0.114725	0.113261	0.112975	0.112361	0.111538	0.111443	0.111061	0.110949	0.111362	0.110838	0.110768	0.110733	0.110338	0.110198	0.109929	0.110087	0.110188	0.109582	0.110265	0.110367	0.109847	0.110682	0.110592	0.11056	0.110123	0.110357	0.11021	0.110681	0.110449	0.110676	0.110836	0.110682	0.110346	0.111246	0.111436	0.111515	0.110725	0.110647	0.110995	0.1111	0.111135
csedlakii_ID773	Carbon	D-Arabinose	F10	0.106174	0.108498	0.111845	0.120039	0.119755	0.119434	0.118867	0.118808	0.118339	0.117936	0.118811	0.118888	0.118652	0.118861	0.11847	0.118852	0.119321	0.118844	0.119086	0.119336	0.119433	0.120654	0.120265	0.120863	0.121529	0.121909	0.122775	0.123273	0.12384	0.123781	0.124479	0.124921	0.125733	0.125775	0.126657	0.126809	0.127384	0.127384	0.127595	0.127789	0.128066	0.127632	0.128024	0.128393	0.128373	0.128617
csedlakii_ID773	Carbon	L-Tryptophan	F11	0.113919	0.112188	0.121849	0.137805	0.141898	0.143864	0.147634	0.149695	0.150824	0.151931	0.153359	0.154436	0.154484	0.152693	0.152048	0.151566	0.152044	0.150091	0.148817	0.149903	0.149781	0.151395	0.150523	0.149785	0.149713	0.14933	0.150102	0.149025	0.148287	0.147652	0.148118	0.147873	0.14745	0.147013	0.147009	0.148721	0.147874	0.146868	0.14707	0.145971	0.1462	0.146263	0.146074	0.146116	0.146086	0.146245
csedlakii_ID773	Carbon	L-Pyro-Glutamic Acid	F12	0.109227	0.101144	0.11142	0.118925	0.120034	0.120191	0.122041	0.123279	0.124873	0.125469	0.126167	0.126858	0.127588	0.128465	0.129115	0.129975	0.130961	0.132032	0.133178	0.134869	0.136085	0.138161	0.140606	0.14212	0.14447	0.147324	0.149675	0.152504	0.154694	0.157242	0.16026	0.16237	0.162417	0.16385	0.165022	0.166835	0.168972	0.171127	0.170055	0.167681	0.167756	0.167972	0.168279	0.169122	0.169638	0.171396
csedlakii_ID773	Nitrogen	Negative Control	G1	0.116969	0.109893	0.126717	0.135015	0.142196	0.156249	0.174223	0.187274	0.199609	0.203858	0.208928	0.213016	0.21577	0.223231	0.230513	0.237727	0.244653	0.253143	0.262379	0.267347	0.269756	0.27327	0.278049	0.282558	0.291776	0.291426	0.294952	0.300472	0.303861	0.306347	0.310597	0.312801	0.315436	0.317882	0.31745	0.315832	0.314498	0.317113	0.321731	0.328818	0.331413	0.337009	0.338228	0.33839	0.340018	0.34045
csedlakii_ID773	Nitrogen	Tyramine	G2	0.120264	0.113903	0.119293	0.126128	0.129299	0.130188	0.131444	0.13133	0.131435	0.131731	0.13189	0.131288	0.131316	0.133046	0.13093	0.132034	0.132264	0.131058	0.132517	0.131651	0.131865	0.13211	0.130576	0.133034	0.13292	0.133681	0.135282	0.136082	0.137412	0.13718	0.138875	0.140437	0.141132	0.141565	0.145624	0.147209	0.146853	0.147403	0.151736	0.157191	0.161649	0.16713	0.174512	0.180684	0.189402	0.197377
csedlakii_ID773	Nitrogen	Uridine	G3	0.116912	0.115842	0.120308	0.130383	0.138117	0.14891	0.16697	0.180584	0.191324	0.201651	0.209677	0.21601	0.22225	0.230145	0.233705	0.238581	0.244683	0.250167	0.257897	0.262367	0.266747	0.269866	0.275067	0.280371	0.287526	0.289667	0.292142	0.296976	0.300599	0.305128	0.309064	0.315748	0.314781	0.318491	0.318962	0.321153	0.323595	0.324646	0.328496	0.33324	0.334614	0.332296	0.334032	0.335956	0.335463	0.336251
csedlakii_ID773	Nitrogen	Inosine	G4	0.111621	0.115886	0.11713	0.127712	0.134387	0.139883	0.145616	0.154157	0.168489	0.185397	0.189455	0.195016	0.200302	0.208417	0.216436	0.222963	0.230013	0.236578	0.244169	0.250194	0.255208	0.260741	0.267011	0.273721	0.270677	0.281715	0.287655	0.293676	0.297836	0.301273	0.304472	0.307038	0.309527	0.311288	0.311695	0.312012	0.312681	0.314304	0.314709	0.313611	0.312908	0.31462	0.312099	0.312982	0.311744	0.313661
csedlakii_ID773	Nitrogen	Histamine	G5	0.114456	0.115146	0.120822	0.136207	0.144543	0.162127	0.173027	0.179222	0.185505	0.192798	0.200042	0.206006	0.211882	0.222822	0.229242	0.236849	0.243582	0.251866	0.25943	0.265383	0.270307	0.277794	0.283059	0.289184	0.294569	0.298518	0.304872	0.310716	0.313988	0.317501	0.321067	0.325003	0.328377	0.331267	0.330385	0.332576	0.336443	0.337489	0.337807	0.339713	0.340669	0.340998	0.341354	0.342876	0.345593	0.344628
csedlakii_ID773	Nitrogen	L-Pyro-Glutamic Acid	G6	0.114366	0.116984	0.116164	0.125939	0.133456	0.145904	0.163326	0.17681	0.185626	0.199868	0.219259	0.225452	0.236187	0.246004	0.251887	0.255133	0.255554	0.256805	0.260584	0.26027	0.259975	0.26268	0.264524	0.265768	0.266267	0.268148	0.271183	0.271215	0.27343	0.274645	0.277474	0.278346	0.28065	0.280433	0.284068	0.284465	0.283252	0.282192	0.284531	0.286177	0.284836	0.285885	0.285087	0.283016	0.281899	0.281666
csedlakii_ID773	Nitrogen	Cytidine	G7	0.109907	0.111735	0.113484	0.123521	0.129649	0.136739	0.144919	0.163146	0.187463	0.213191	0.245667	0.291344	0.369524	0.5136	0.586276	0.630518	0.706793	0.709491	0.680344	0.705399	0.712927	0.718851	0.726642	0.737919	0.753676	0.765215	0.776747	0.776968	0.783965	0.799953	0.806066	0.808583	0.814396	0.814548	0.818032	0.817758	0.822473	0.823375	0.824165	0.825707	0.826826	0.830447	0.829977	0.838906	0.832058	0.841382
csedlakii_ID773	Nitrogen	Adenosine	G8	0.115462	0.118875	0.11723	0.125302	0.129783	0.136323	0.147078	0.162811	0.184399	0.207615	0.236598	0.278638	0.345236	0.424006	0.460104	0.496917	0.533391	0.560395	0.59127	0.61938	0.643746	0.658241	0.670496	0.678552	0.683334	0.693263	0.698872	0.703873	0.705444	0.708123	0.713509	0.717169	0.720958	0.720236	0.72363	0.723526	0.721959	0.7209	0.721686	0.721425	0.721116	0.723904	0.721847	0.726197	0.726565	0.728969
csedlakii_ID773	Nitrogen	L-Arginine	G9	0.114317	0.121005	0.122272	0.132727	0.140024	0.150688	0.167825	0.178072	0.186847	0.194964	0.20611	0.216508	0.301324	0.320902	0.340327	0.357394	0.374885	0.391317	0.332607	0.344978	0.359967	0.369135	0.377899	0.380824	0.376804	0.373847	0.374976	0.375682	0.376418	0.379211	0.380218	0.381428	0.384258	0.385778	0.385953	0.386047	0.386659	0.389304	0.391054	0.392792	0.397215	0.397886	0.401071	0.403734	0.40526	0.409417
csedlakii_ID773	Nitrogen	Thiourea	G10	0.11215	0.114016	0.113874	0.12391	0.13034	0.142055	0.153338	0.162124	0.172024	0.18082	0.186563	0.187733	0.18526	0.186235	0.185435	0.187286	0.189771	0.192837	0.195913	0.19936	0.200775	0.20363	0.206323	0.208718	0.211645	0.213771	0.217825	0.220942	0.224129	0.225818	0.228319	0.230466	0.233043	0.233444	0.234675	0.235703	0.237071	0.237856	0.239616	0.240723	0.240866	0.242459	0.243074	0.243107	0.243956	0.244528
csedlakii_ID773	Nitrogen	Biuret	G11	0.111969	0.113367	0.11495	0.124782	0.129836	0.137739	0.153757	0.172692	0.18558	0.1973	0.203473	0.20698	0.209606	0.21189	0.212853	0.215224	0.218127	0.221052	0.225898	0.231566	0.23601	0.240217	0.243746	0.246584	0.250335	0.25404	0.257718	0.260879	0.263105	0.265095	0.267259	0.269173	0.272252	0.272554	0.274331	0.275525	0.278682	0.278862	0.279921	0.279984	0.279655	0.280086	0.280146	0.280053	0.280262	0.279938
csedlakii_ID773	Nitrogen	Guanidine	G12	0.109492	0.107221	0.109556	0.112987	0.11307	0.112998	0.113724	0.114206	0.115016	0.115876	0.116285	0.117359	0.118279	0.119304	0.119816	0.12038	0.120917	0.121643	0.122612	0.123084	0.124116	0.125057	0.126254	0.126491	0.12797	0.130608	0.133015	0.135772	0.140659	0.145912	0.157832	0.167528	0.172514	0.180777	0.187462	0.194182	0.203243	0.209679	0.214912	0.222132	0.228605	0.236256	0.242409	0.248781	0.253939	0.260001
csedlakii_ID773	Nitrogen	L-Histidine	H1	0.112232	0.123214	0.127651	0.135051	0.143949	0.153198	0.160082	0.168171	0.178391	0.188982	0.195915	0.203807	0.214991	0.22348	0.230696	0.239367	0.248056	0.255276	0.264878	0.272654	0.27706	0.281966	0.287141	0.289821	0.29741	0.28633	0.276145	0.257366	0.258748	0.254845	0.250857	0.245609	0.238715	0.230473	0.22951	0.228594	0.224464	0.219403	0.217364	0.223438	0.227565	0.235776	0.233591	0.231621	0.233322	0.237757
csedlakii_ID773	Nitrogen	Thymine	H2	0.111069	0.105969	0.120166	0.129632	0.135076	0.147974	0.152062	0.157872	0.163532	0.169838	0.174953	0.179741	0.185386	0.18922	0.196596	0.204754	0.213875	0.222976	0.234095	0.241912	0.24694	0.250976	0.257005	0.262076	0.270395	0.269704	0.271258	0.275012	0.276975	0.280003	0.284055	0.285201	0.287301	0.289545	0.291046	0.290306	0.290206	0.292101	0.297528	0.304483	0.308762	0.31037	0.312046	0.312087	0.313969	0.313197
csedlakii_ID773	Nitrogen	L-Glutathione	H3	0.112538	0.108054	0.121093	0.135634	0.154511	0.172289	0.186823	0.20361	0.225409	0.25021	0.270128	0.298057	0.324232	0.341963	0.36456	0.392182	0.389465	0.370966	0.365211	0.358771	0.354664	0.354005	0.354609	0.360367	0.357041	0.359108	0.360537	0.362833	0.361721	0.364568	0.367852	0.370016	0.371808	0.374675	0.385409	0.383778	0.382168	0.381961	0.394815	0.405058	0.41127	0.424191	0.431027	0.429889	0.438718	0.441552
csedlakii_ID773	Nitrogen	Allantoin	H4	0.113205	0.108693	0.119993	0.130947	0.141796	0.146604	0.151064	0.156534	0.164369	0.171119	0.177851	0.181453	0.186423	0.19266	0.198382	0.203526	0.211277	0.218927	0.228833	0.236896	0.240747	0.246507	0.253081	0.260372	0.265325	0.269419	0.273354	0.278073	0.279451	0.283896	0.286921	0.28858	0.291218	0.291656	0.293519	0.292152	0.290918	0.291437	0.293782	0.296795	0.299212	0.302678	0.300221	0.299228	0.298279	0.297201
csedlakii_ID773	Nitrogen	Adenine	H5	0.111446	0.107024	0.116627	0.124264	0.129372	0.134173	0.140076	0.151774	0.165957	0.175346	0.181066	0.188093	0.198764	0.211265	0.221425	0.233414	0.246494	0.259929	0.272772	0.286916	0.298615	0.308341	0.314211	0.324922	0.333827	0.342107	0.347686	0.354266	0.354458	0.361783	0.368911	0.370177	0.375088	0.378805	0.386227	0.386655	0.390282	0.392785	0.402802	0.413911	0.415024	0.429127	0.42879	0.430211	0.43645	0.436686
csedlakii_ID773	Nitrogen	Glycine	H6	0.117111	0.113159	0.121836	0.131142	0.137057	0.14308	0.149046	0.153289	0.156804	0.160121	0.165242	0.169731	0.175668	0.179983	0.183757	0.187381	0.191565	0.196454	0.201061	0.205882	0.210381	0.215935	0.223667	0.231403	0.239139	0.246121	0.252073	0.258599	0.264011	0.268572	0.2671	0.264058	0.258538	0.254772	0.254697	0.253305	0.252308	0.25313	0.253816	0.255299	0.256668	0.258619	0.260761	0.263519	0.267418	0.270841
csedlakii_ID773	Nitrogen	Beta-Phenylethylamine	H7	0.112996	0.107157	0.115495	0.123632	0.127828	0.130655	0.131975	0.13379	0.135149	0.135798	0.137241	0.138966	0.142275	0.144264	0.146671	0.149241	0.152596	0.156126	0.16056	0.163583	0.166188	0.172319	0.174491	0.176046	0.176913	0.177209	0.179095	0.178034	0.176015	0.177237	0.177967	0.177479	0.178272	0.177192	0.178146	0.178006	0.177213	0.178145	0.180799	0.183099	0.182916	0.185924	0.182945	0.182614	0.182245	0.181717
csedlakii_ID773	Nitrogen	L-Proline	H8	0.113614	0.10924	0.113743	0.123412	0.130756	0.137332	0.142417	0.148481	0.155958	0.163802	0.171978	0.180036	0.192625	0.205937	0.219543	0.233322	0.245398	0.255953	0.268781	0.277264	0.282992	0.290812	0.300114	0.310747	0.319113	0.327658	0.336404	0.344406	0.349688	0.357282	0.363781	0.369502	0.374519	0.378792	0.390422	0.398176	0.405946	0.41577	0.424565	0.435672	0.442148	0.451767	0.458927	0.459321	0.467278	0.475962
csedlakii_ID773	Nitrogen	D-Methionine	H9	0.112109	0.116618	0.123744	0.132433	0.138478	0.142463	0.146768	0.152844	0.159026	0.164085	0.168091	0.172136	0.174891	0.180757	0.18467	0.188681	0.192432	0.195218	0.198997	0.200601	0.203223	0.204952	0.207413	0.210041	0.213505	0.215668	0.218418	0.221998	0.222313	0.226163	0.228426	0.232178	0.235653	0.236663	0.238613	0.239037	0.242042	0.243973	0.24617	0.248956	0.250771	0.253314	0.253437	0.253814	0.255124	0.255177
csedlakii_ID773	Nitrogen	Cytosine	H10	0.115516	0.110848	0.119764	0.129541	0.136066	0.142281	0.145549	0.15005	0.155646	0.161992	0.169168	0.17753	0.191708	0.194793	0.201975	0.208469	0.215248	0.2215	0.227031	0.231698	0.236997	0.241478	0.246531	0.251987	0.258421	0.264058	0.269957	0.274987	0.281686	0.28632	0.289524	0.296821	0.302732	0.307526	0.309501	0.313779	0.31768	0.322373	0.325201	0.328238	0.331041	0.329846	0.32936	0.339693	0.361144	0.38482
csedlakii_ID773	Nitrogen	D-Valine	H11	0.112948	0.115769	0.122855	0.129741	0.135641	0.139313	0.142159	0.145139	0.148447	0.152472	0.155765	0.158868	0.169171	0.168013	0.169299	0.172661	0.173897	0.176026	0.174317	0.175163	0.176296	0.181178	0.183006	0.185803	0.186175	0.186021	0.186841	0.187905	0.189758	0.1904	0.190785	0.191567	0.191044	0.19085	0.191066	0.191426	0.191926	0.192561	0.192513	0.192433	0.191827	0.191805	0.191508	0.191223	0.190947	0.191139
csedlakii_ID773	Nitrogen	N-Acetyl-D-Glucosamine	H12	0.111918	0.112813	0.120622	0.125957	0.131241	0.139062	0.1449	0.152677	0.164023	0.177772	0.191623	0.209428	0.249395	0.260184	0.296148	0.346206	0.397607	0.458161	0.473085	0.489144	0.476477	0.459724	0.461865	0.462446	0.467305	0.476211	0.478062	0.473837	0.473193	0.47109	0.470836	0.480542	0.473959	0.471262	0.47685	0.480204	0.476836	0.482509	0.490212	0.492755	0.48392	0.490035	0.496022	0.491967	0.493426	0.491306
csedlakii_ID953	Carbon	Propionate	A1	0.0946141	0.0967055	0.106015	0.112003	0.112062	0.111565	0.113703	0.116312	0.11694	0.118155	0.119875	0.120614	0.121354	0.122651	0.123964	0.125319	0.126824	0.125997	0.126527	0.125152	0.126286	0.127042	0.128176	0.130161	0.13113	0.132455	0.134083	0.136335	0.138119	0.14115	0.141856	0.144124	0.147346	0.148038	0.153868	0.162694	0.169784	0.172985	0.174533	0.175607	0.176062	0.17396	0.172254	0.166484	0.165803	0.169011
csedlakii_ID953	Carbon	L-Glutamic Acid	A2	0.0923079	0.0976856	0.1025	0.109148	0.111452	0.115114	0.119913	0.124166	0.126554	0.129639	0.132432	0.134729	0.136531	0.139531	0.141586	0.143937	0.146623	0.144587	0.14527	0.142013	0.144639	0.144787	0.146137	0.149352	0.149949	0.151874	0.15421	0.156342	0.158015	0.160894	0.162052	0.164114	0.168711	0.17014	0.177411	0.187115	0.197528	0.20252	0.206522	0.208521	0.210079	0.208003	0.205357	0.198417	0.195315	0.19643
csedlakii_ID953	Carbon	D-Glucose	A3	0.113417	0.11355	0.117931	0.123255	0.124082	0.13299	0.1448	0.159699	0.174751	0.192541	0.219343	0.256718	0.300074	0.397894	0.374769	0.377807	0.390308	0.419196	0.444468	0.469494	0.481952	0.489211	0.51037	0.513085	0.529101	0.540403	0.529995	0.544707	0.548584	0.547079	0.556086	0.560792	0.560504	0.56552	0.568072	0.582143	0.578022	0.580449	0.576341	0.579694	0.586931	0.588054	0.582825	0.582061	0.578211	0.589705
csedlakii_ID953	Carbon	Potassium Sorbate	A4	0.0961502	0.0999192	0.100952	0.107	0.109018	0.112907	0.11575	0.119305	0.119504	0.120979	0.12208	0.12435	0.124176	0.125723	0.12752	0.128675	0.130047	0.128675	0.12897	0.12471	0.1273	0.124557	0.124144	0.12551	0.123682	0.122523	0.122228	0.12316	0.120185	0.120122	0.118633	0.121062	0.119408	0.119451	0.119165	0.118426	0.11807	0.119937	0.119491	0.120192	0.121062	0.120616	0.119175	0.119037	0.117786	0.116622
csedlakii_ID953	Carbon	Lactulose	A5	0.0950332	0.0969282	0.0985267	0.10381	0.106192	0.111374	0.114547	0.118714	0.119104	0.120074	0.120532	0.122621	0.122242	0.124251	0.126041	0.127561	0.129137	0.127557	0.128163	0.124187	0.126163	0.125158	0.125251	0.127692	0.127021	0.127451	0.12818	0.129838	0.129206	0.130525	0.131663	0.131217	0.132093	0.132794	0.133583	0.136595	0.1397	0.143658	0.1449	0.144299	0.143829	0.141772	0.138969	0.136212	0.133541	0.133987
csedlakii_ID953	Carbon	Glycerol	A6	0.0940537	0.098449	0.0986394	0.105474	0.108377	0.11244	0.117281	0.123779	0.131901	0.142228	0.149886	0.158909	0.167411	0.179923	0.194128	0.210586	0.225317	0.237453	0.24821	0.262878	0.280214	0.300708	0.318472	0.351835	0.373796	0.400318	0.423355	0.453538	0.476012	0.4973	0.523932	0.546005	0.559583	0.588832	0.604067	0.628484	0.643969	0.666243	0.676742	0.686537	0.696108	0.701957	0.703252	0.708372	0.704748	0.713518
csedlakii_ID953	Carbon	Myo-Inositol	A7	0.095627	0.0988173	0.0986902	0.105201	0.109483	0.114208	0.118056	0.122253	0.123452	0.125652	0.127272	0.128992	0.129693	0.132301	0.134923	0.137943	0.14086	0.141778	0.142916	0.14092	0.144464	0.145499	0.148642	0.15439	0.158053	0.162462	0.168261	0.174718	0.179498	0.1857	0.190033	0.195328	0.200044	0.20358	0.211881	0.224537	0.235584	0.241787	0.247076	0.25083	0.252874	0.256008	0.255823	0.24986	0.244574	0.24811
csedlakii_ID953	Carbon	D-Serine	A8	0.10041	0.102027	0.102007	0.108661	0.113999	0.120681	0.126987	0.135256	0.141633	0.149192	0.157627	0.166166	0.175791	0.187923	0.201372	0.21598	0.23167	0.241627	0.245832	0.263733	0.281788	0.294358	0.303813	0.313844	0.318549	0.325982	0.326098	0.335162	0.341241	0.351849	0.361427	0.372528	0.377156	0.395316	0.403758	0.414136	0.422444	0.431397	0.445627	0.459325	0.459419	0.477374	0.479738	0.493313	0.492507	0.50113
csedlakii_ID953	Carbon	D-Galactose	A9	0.0971677	0.101052	0.101085	0.107773	0.114252	0.121922	0.129278	0.140068	0.151548	0.164216	0.17458	0.183392	0.193653	0.203842	0.214095	0.229835	0.245629	0.258726	0.274381	0.295157	0.325465	0.358002	0.369142	0.388718	0.387607	0.38396	0.388979	0.39662	0.405619	0.421424	0.429913	0.440966	0.446571	0.45581	0.463936	0.471419	0.478331	0.48366	0.489759	0.495195	0.499923	0.504119	0.507761	0.516234	0.518663	0.526003
csedlakii_ID953	Carbon	Oxalic Acid	A10	0.0932799	0.0987927	0.0985282	0.104363	0.108589	0.112331	0.113521	0.115126	0.115539	0.118874	0.120441	0.120727	0.122282	0.123913	0.12409	0.12679	0.128337	0.127178	0.126218	0.124116	0.125032	0.124201	0.125925	0.127763	0.128314	0.130542	0.131443	0.132313	0.131473	0.133746	0.133809	0.134895	0.13685	0.138001	0.140321	0.14026	0.140564	0.139869	0.140731	0.143931	0.1467	0.146536	0.145859	0.145279	0.146131	0.14803
csedlakii_ID953	Carbon	Malic Acid	A11	0.09545	0.0972577	0.0969096	0.0978314	0.102688	0.105734	0.105615	0.106649	0.107141	0.109123	0.110386	0.109926	0.111419	0.111066	0.111201	0.113081	0.113665	0.111731	0.111325	0.108125	0.109567	0.107268	0.108073	0.108843	0.108992	0.109944	0.111076	0.111561	0.112701	0.115147	0.115355	0.119977	0.123027	0.124955	0.128963	0.131398	0.135254	0.13712	0.13981	0.143273	0.147273	0.148787	0.14991	0.150996	0.153108	0.155694
csedlakii_ID953	Carbon	L-Methionine	A12	0.0995794	0.10027	0.0993577	0.0993159	0.0990761	0.0990111	0.099389	0.0997392	0.100358	0.101127	0.102156	0.102144	0.10318	0.102075	0.102982	0.103866	0.104327	0.103442	0.103225	0.101694	0.101673	0.101199	0.101907	0.101993	0.102059	0.102064	0.102249	0.10171	0.102139	0.103205	0.102362	0.102376	0.103508	0.10364	0.103987	0.1048	0.105865	0.105861	0.105957	0.106475	0.107259	0.106383	0.105741	0.103666	0.103646	0.103218
csedlakii_ID953	Carbon	Glycine	B1	0.100451	0.0984743	0.102377	0.109261	0.112383	0.1133	0.117696	0.118752	0.118679	0.11995	0.120301	0.121311	0.121646	0.122316	0.123295	0.124058	0.124869	0.122548	0.121997	0.120935	0.121289	0.122024	0.121749	0.123188	0.122721	0.122715	0.122509	0.124045	0.123376	0.124387	0.124785	0.125442	0.125498	0.126568	0.128728	0.132198	0.135902	0.137322	0.138127	0.137581	0.137129	0.136207	0.132956	0.129779	0.127548	0.128029
csedlakii_ID953	Carbon	Negative Control	B2	0.1053	0.104288	0.100312	0.105455	0.109402	0.112023	0.115425	0.118548	0.119467	0.121585	0.122826	0.123763	0.124086	0.125381	0.126316	0.127287	0.128484	0.126609	0.126125	0.123835	0.12471	0.124912	0.125023	0.126446	0.12558	0.125587	0.126179	0.127656	0.126962	0.12789	0.127902	0.128491	0.128042	0.128924	0.131452	0.133256	0.136453	0.136525	0.136373	0.13618	0.135193	0.13443	0.131379	0.128791	0.127285	0.127708
csedlakii_ID953	Carbon	Quinate	B3	0.103029	0.102493	0.0993265	0.105155	0.110253	0.111968	0.113151	0.114257	0.114644	0.11595	0.116799	0.11731	0.11754	0.118394	0.11901	0.119858	0.120796	0.118864	0.118161	0.115249	0.115667	0.115353	0.115391	0.116476	0.115487	0.115763	0.116288	0.116924	0.116843	0.118302	0.117908	0.118111	0.118932	0.119502	0.12185	0.123798	0.12655	0.127268	0.12783	0.127987	0.127245	0.1273	0.124734	0.123177	0.12134	0.121917
csedlakii_ID953	Carbon	Succinate	B4	0.101357	0.103873	0.10072	0.103939	0.10858	0.112861	0.116938	0.121829	0.125425	0.130283	0.136016	0.142129	0.147266	0.152772	0.159018	0.166342	0.174273	0.182109	0.186621	0.189861	0.196832	0.204843	0.21604	0.230166	0.241656	0.253776	0.266822	0.278212	0.288631	0.298846	0.308614	0.319763	0.321613	0.324115	0.329258	0.333825	0.335933	0.336628	0.337533	0.347725	0.352516	0.368572	0.373496	0.379457	0.390177	0.40004
csedlakii_ID953	Carbon	Dulcitol	B5	0.104438	0.10842	0.107602	0.112184	0.117536	0.122008	0.125457	0.129419	0.131812	0.134784	0.138869	0.14254	0.146207	0.151418	0.159971	0.169882	0.185263	0.201048	0.214384	0.229463	0.245911	0.264095	0.282646	0.303467	0.337062	0.376613	0.411941	0.456198	0.474517	0.492213	0.490119	0.512859	0.525013	0.537586	0.550183	0.561742	0.569779	0.575991	0.58007	0.588871	0.588237	0.594272	0.596444	0.600415	0.604556	0.606805
csedlakii_ID953	Carbon	Alpha-D-Glucose	B6	0.105677	0.107543	0.108069	0.112903	0.121223	0.129197	0.139051	0.152941	0.169091	0.187723	0.210342	0.242108	0.294151	0.392498	0.426443	0.420833	0.424704	0.440179	0.455897	0.4838	0.490036	0.507851	0.51503	0.517259	0.522664	0.530937	0.539296	0.537357	0.543426	0.550543	0.548326	0.547691	0.548782	0.552582	0.55298	0.563087	0.560257	0.561048	0.563314	0.571654	0.565674	0.568751	0.567377	0.583487	0.580737	0.575661
csedlakii_ID953	Carbon	L-Xylose	B7	0.0996679	0.101372	0.0994804	0.101194	0.105213	0.108517	0.111368	0.113995	0.115388	0.117212	0.118998	0.119925	0.120202	0.121164	0.121654	0.123498	0.124577	0.123544	0.123104	0.12124	0.121844	0.121472	0.122159	0.123371	0.122912	0.122967	0.123575	0.124371	0.124701	0.126682	0.126047	0.126464	0.12739	0.127998	0.130013	0.132809	0.135723	0.136234	0.136768	0.137441	0.137149	0.137095	0.135117	0.133059	0.13087	0.131627
csedlakii_ID953	Carbon	L-Aspartic Acid	B8	0.102735	0.102121	0.099174	0.101201	0.108894	0.112361	0.115009	0.118388	0.12071	0.124308	0.127597	0.129678	0.131352	0.133917	0.136374	0.13974	0.142338	0.143531	0.143814	0.142972	0.145137	0.14728	0.151002	0.156454	0.161595	0.166668	0.17259	0.17968	0.185986	0.19342	0.198982	0.205456	0.212606	0.219579	0.228064	0.238157	0.245883	0.25175	0.258004	0.264893	0.270593	0.277417	0.283264	0.289283	0.29672	0.305568
csedlakii_ID953	Carbon	D-Fructose	B9	0.102222	0.103864	0.103631	0.107705	0.114474	0.120246	0.125643	0.133321	0.142701	0.154066	0.16614	0.179395	0.199318	0.22464	0.260763	0.33935	0.434137	0.455181	0.45139	0.462994	0.474706	0.476796	0.488045	0.489132	0.498657	0.50825	0.509622	0.51511	0.520925	0.53691	0.538537	0.542844	0.54917	0.549522	0.557673	0.562772	0.571455	0.5705	0.579208	0.593346	0.581842	0.579215	0.582876	0.585398	0.588176	0.591463
csedlakii_ID953	Carbon	L-Valine	B10	0.103528	0.102477	0.098021	0.0980588	0.101773	0.104281	0.106286	0.110766	0.109561	0.111974	0.11368	0.113309	0.114134	0.116182	0.115619	0.119001	0.117958	0.117015	0.115634	0.113425	0.114315	0.113614	0.113938	0.116457	0.114732	0.115656	0.116153	0.116114	0.117829	0.117792	0.116254	0.117128	0.117773	0.117714	0.121381	0.122289	0.123223	0.123328	0.123618	0.124027	0.124764	0.123869	0.121634	0.120299	0.120009	0.120075
csedlakii_ID953	Carbon	Pyruvate	B11	0.0982347	0.101399	0.102134	0.103929	0.107133	0.111972	0.118344	0.1265	0.134526	0.146731	0.160858	0.176999	0.199196	0.226219	0.253752	0.287599	0.30658	0.326037	0.326654	0.327334	0.333568	0.332543	0.342506	0.352191	0.359087	0.368168	0.378916	0.382126	0.388724	0.399324	0.4052	0.415528	0.424624	0.43128	0.442554	0.45279	0.458741	0.463972	0.472293	0.48123	0.489353	0.496761	0.494571	0.50029	0.507085	0.510406
csedlakii_ID953	Carbon	Lactate	B12	0.098488	0.100427	0.101622	0.102767	0.105092	0.107729	0.111928	0.117322	0.121785	0.126409	0.131933	0.136967	0.143504	0.150112	0.156866	0.165605	0.175788	0.185333	0.196146	0.206426	0.218488	0.229853	0.241009	0.256691	0.268302	0.284732	0.300721	0.320175	0.341653	0.361703	0.389831	0.415414	0.439744	0.477959	0.508416	0.53791	0.571965	0.602159	0.629382	0.664995	0.693342	0.719453	0.739916	0.763917	0.781275	0.803066
csedlakii_ID953	Carbon	Citric Acid	C1	0.0994032	0.100518	0.10151	0.110035	0.114404	0.114207	0.114762	0.116254	0.115621	0.11686	0.11712	0.117752	0.118255	0.119081	0.120472	0.122001	0.123184	0.122572	0.122287	0.123251	0.124779	0.127433	0.130761	0.134635	0.138035	0.14247	0.14641	0.151904	0.156953	0.163074	0.167762	0.17442	0.180745	0.185366	0.194795	0.205987	0.215892	0.221128	0.220595	0.216021	0.20822	0.201055	0.197772	0.195102	0.19813	0.202354
csedlakii_ID953	Carbon	D-Mannose	C2	0.102996	0.106204	0.106656	0.112429	0.120557	0.125819	0.135088	0.144507	0.1508	0.157275	0.165871	0.175928	0.193823	0.218902	0.253378	0.299744	0.376893	0.429376	0.438668	0.413834	0.433646	0.468314	0.486349	0.503615	0.518315	0.532569	0.523767	0.553165	0.557733	0.560072	0.558978	0.582727	0.578363	0.591651	0.594672	0.61384	0.625226	0.635739	0.641415	0.651908	0.663054	0.671249	0.678632	0.691156	0.69599	0.705648
csedlakii_ID953	Carbon	L-Serine	C3	0.101526	0.102227	0.099304	0.101878	0.107413	0.112816	0.118534	0.124538	0.128943	0.134782	0.140569	0.146244	0.15126	0.15681	0.162336	0.169026	0.174705	0.175097	0.175588	0.174684	0.177446	0.180401	0.182836	0.186662	0.188244	0.190355	0.193133	0.196422	0.200228	0.20567	0.208549	0.212943	0.219876	0.225736	0.236058	0.247225	0.257635	0.265148	0.271571	0.277333	0.282332	0.287327	0.291019	0.293179	0.297417	0.306027
csedlakii_ID953	Carbon	Salicoside	C4	0.104676	0.10557	0.103294	0.104855	0.108574	0.113295	0.117734	0.121897	0.124824	0.128188	0.131375	0.133286	0.135077	0.137085	0.139233	0.141668	0.143491	0.143622	0.142863	0.141881	0.142974	0.144241	0.145225	0.147958	0.149166	0.150541	0.15273	0.154482	0.155034	0.15707	0.158004	0.158957	0.160199	0.161591	0.164365	0.167319	0.169354	0.169239	0.170144	0.170603	0.169578	0.16945	0.166484	0.164964	0.162599	0.16321
csedlakii_ID953	Carbon	Cellobiose	C5	0.0993561	0.104113	0.103457	0.104388	0.106936	0.111383	0.11465	0.118045	0.119809	0.122669	0.125984	0.129416	0.132367	0.13684	0.141113	0.147428	0.157661	0.171657	0.187151	0.212942	0.232843	0.247758	0.269627	0.29907	0.340905	0.420867	0.41133	0.451291	0.445893	0.452484	0.463082	0.479634	0.508057	0.505511	0.527363	0.52541	0.53649	0.551369	0.560593	0.56297	0.575602	0.57613	0.582509	0.586252	0.590585	0.598291
csedlakii_ID953	Carbon	Adonitol	C6	0.0997377	0.10142	0.0990678	0.100561	0.10365	0.107984	0.11029	0.113925	0.115788	0.118373	0.121293	0.122285	0.123108	0.125321	0.1278	0.130302	0.133034	0.13521	0.137031	0.135883	0.135512	0.136039	0.137484	0.139882	0.140398	0.140694	0.141486	0.142629	0.143938	0.145488	0.146237	0.147838	0.149476	0.150851	0.154163	0.158975	0.162582	0.163081	0.164319	0.165491	0.164996	0.165293	0.162881	0.160822	0.159011	0.160184
csedlakii_ID953	Carbon	D-Glucose-6-Phosphate	C7	0.0991862	0.103008	0.105529	0.107152	0.109589	0.115054	0.119289	0.12398	0.130427	0.13904	0.150486	0.160541	0.171364	0.191209	0.220235	0.259934	0.330123	0.40343	0.433806	0.488731	0.50957	0.533035	0.543338	0.544902	0.567958	0.56443	0.577324	0.581104	0.588781	0.590536	0.598075	0.59896	0.593842	0.601266	0.602403	0.601646	0.613294	0.611531	0.61709	0.615166	0.620023	0.620063	0.628001	0.632045	0.629105	0.629683
csedlakii_ID953	Carbon	L-Sorbose	C8	0.100191	0.102883	0.102671	0.10336	0.103484	0.107394	0.109947	0.112906	0.114905	0.117693	0.120134	0.12146	0.121972	0.1232	0.124531	0.126458	0.128316	0.128527	0.127654	0.125827	0.126341	0.126438	0.127196	0.128906	0.128922	0.129091	0.129976	0.131287	0.131579	0.132732	0.13245	0.133916	0.134392	0.135239	0.138737	0.142645	0.145133	0.144513	0.144926	0.145931	0.14599	0.146555	0.144577	0.142826	0.142952	0.143475
csedlakii_ID953	Carbon	D-Arabitol	C9	0.0962128	0.100803	0.0985203	0.0988908	0.103264	0.106719	0.109092	0.111224	0.112467	0.114388	0.116189	0.116402	0.116179	0.117125	0.117712	0.118892	0.120042	0.119489	0.117984	0.116367	0.116846	0.116621	0.117385	0.11902	0.11904	0.119791	0.120394	0.122388	0.122564	0.123622	0.123345	0.124642	0.124937	0.126031	0.128895	0.131701	0.133056	0.132556	0.132821	0.133878	0.133874	0.133739	0.131767	0.130228	0.129635	0.132317
csedlakii_ID953	Carbon	L-Lysine	C10	0.103573	0.105409	0.100762	0.100137	0.102351	0.105977	0.108418	0.110665	0.111556	0.113475	0.115136	0.115108	0.114942	0.115315	0.116331	0.117578	0.118904	0.118283	0.11718	0.115323	0.116125	0.11586	0.116466	0.118741	0.119184	0.119702	0.121188	0.122294	0.121838	0.122792	0.122246	0.123565	0.123501	0.124524	0.12753	0.130415	0.130621	0.129397	0.12942	0.130473	0.131034	0.130868	0.128584	0.127404	0.127024	0.129759
csedlakii_ID953	Carbon	Trehalose	C11	0.100357	0.105324	0.105483	0.108354	0.112701	0.120517	0.130207	0.141732	0.153073	0.164837	0.184999	0.211966	0.248324	0.325525	0.425347	0.480005	0.482217	0.487802	0.481308	0.488793	0.507007	0.513714	0.525042	0.537211	0.542654	0.547265	0.553772	0.556766	0.56834	0.579729	0.581544	0.587826	0.597229	0.601499	0.611609	0.614494	0.624945	0.626906	0.634222	0.634777	0.633109	0.638532	0.63903	0.634746	0.632086	0.632052
csedlakii_ID953	Carbon	Acetic Acid	C12	0.0961604	0.10155	0.0984553	0.0984204	0.098533	0.0989607	0.100303	0.101742	0.103609	0.105137	0.107486	0.109587	0.112075	0.114703	0.11793	0.121568	0.125363	0.12944	0.134791	0.139584	0.146538	0.151823	0.156671	0.160696	0.162473	0.166217	0.172234	0.176422	0.183256	0.190245	0.195464	0.202878	0.210715	0.216227	0.223196	0.231269	0.236591	0.238031	0.242733	0.250334	0.255245	0.260509	0.264905	0.271424	0.276806	0.283649
csedlakii_ID953	Carbon	L-Alanine	D1	0.0961102	0.0969015	0.0970188	0.104556	0.107533	0.108245	0.11202	0.114033	0.114314	0.113971	0.114055	0.116565	0.116924	0.118118	0.119661	0.121635	0.122212	0.121193	0.119612	0.118522	0.118964	0.120219	0.120781	0.122986	0.124454	0.126657	0.129381	0.132359	0.135285	0.13957	0.138759	0.140325	0.142048	0.141383	0.143468	0.148433	0.154249	0.158857	0.165124	0.170342	0.174243	0.177828	0.179539	0.179599	0.181537	0.184606
csedlakii_ID953	Carbon	L-Arabinose	D2	0.0986122	0.0986935	0.0955289	0.0986383	0.105208	0.110125	0.116624	0.125478	0.136023	0.150093	0.166195	0.184817	0.205385	0.23152	0.267956	0.325375	0.40466	0.44504	0.457485	0.460361	0.428314	0.388329	0.368017	0.34787	0.341252	0.338082	0.330212	0.345165	0.351143	0.369524	0.369837	0.395468	0.395253	0.422187	0.420135	0.444602	0.460098	0.456393	0.461328	0.474573	0.474702	0.491355	0.483331	0.487285	0.502239	0.498851
csedlakii_ID953	Carbon	L-Threonine	D3	0.103861	0.10448	0.0992298	0.10031	0.103537	0.107737	0.110939	0.114135	0.115568	0.11869	0.12075	0.122271	0.123182	0.124297	0.125427	0.127399	0.128816	0.127828	0.126088	0.124617	0.125286	0.126292	0.127095	0.128891	0.129536	0.130318	0.132146	0.133213	0.133894	0.135728	0.136241	0.137266	0.138926	0.139704	0.142656	0.145743	0.148	0.148459	0.149392	0.150266	0.148779	0.148642	0.146736	0.144354	0.142469	0.144113
csedlakii_ID953	Carbon	4 Hydroxy-Phenylacetate	D4	0.102999	0.102674	0.0997034	0.10003	0.102027	0.105232	0.108204	0.10997	0.111553	0.113571	0.114948	0.115751	0.116282	0.117035	0.117769	0.118844	0.119665	0.119402	0.118379	0.117277	0.11777	0.118527	0.119214	0.120474	0.121048	0.121444	0.122512	0.12331	0.123674	0.124998	0.125453	0.125728	0.126512	0.126816	0.128579	0.130337	0.131354	0.131468	0.132162	0.132504	0.132053	0.131954	0.130995	0.13047	0.129478	0.130459
csedlakii_ID953	Carbon	D-Ribose	D5	0.101537	0.105484	0.104665	0.103589	0.106016	0.110889	0.115451	0.120363	0.125159	0.133419	0.142683	0.148859	0.154294	0.162533	0.171689	0.186026	0.201239	0.214101	0.224546	0.230123	0.239411	0.255306	0.273202	0.302011	0.322852	0.348562	0.37254	0.402042	0.425256	0.437157	0.438744	0.447073	0.453885	0.461748	0.469509	0.47474	0.482008	0.486026	0.493024	0.500112	0.506526	0.513334	0.517198	0.522812	0.531839	0.536523
csedlakii_ID953	Carbon	Melibiose	D6	0.0986221	0.102034	0.102291	0.10134	0.103405	0.107435	0.110789	0.114588	0.118248	0.124389	0.132318	0.140974	0.14972	0.161882	0.177042	0.20071	0.243234	0.298384	0.358259	0.401245	0.435649	0.470179	0.474745	0.475859	0.482622	0.497009	0.496282	0.501951	0.515727	0.517727	0.535671	0.541736	0.542476	0.54236	0.550366	0.553418	0.566129	0.570431	0.565675	0.576638	0.579212	0.58173	0.583856	0.586137	0.584033	0.58362
csedlakii_ID953	Carbon	D-Alanine	D7	0.101192	0.104902	0.104598	0.103656	0.106604	0.111373	0.114821	0.118202	0.120539	0.124173	0.127162	0.12892	0.130666	0.133422	0.13709	0.140455	0.144021	0.146791	0.148858	0.150971	0.154984	0.158015	0.160118	0.163093	0.164881	0.16592	0.167389	0.169311	0.171258	0.17636	0.179334	0.183947	0.188502	0.195074	0.205308	0.213732	0.21942	0.221735	0.223424	0.223832	0.220767	0.218743	0.212934	0.212177	0.213426	0.21912
csedlakii_ID953	Carbon	L-Fucose	D8	0.0996516	0.101405	0.100293	0.100814	0.104294	0.108142	0.110704	0.113348	0.115184	0.118104	0.120447	0.121548	0.122049	0.123876	0.125911	0.128064	0.130649	0.132176	0.133116	0.13535	0.139627	0.145785	0.151083	0.154345	0.159643	0.166798	0.175862	0.184488	0.19292	0.203159	0.210674	0.212478	0.210481	0.210763	0.215481	0.221875	0.23039	0.238279	0.250315	0.273802	0.290659	0.316892	0.331677	0.348009	0.366827	0.389699
csedlakii_ID953	Carbon	L-Asparagine	D9	0.102692	0.105782	0.105501	0.107023	0.112331	0.118412	0.122552	0.126878	0.130654	0.13563	0.139888	0.142961	0.145356	0.149476	0.154144	0.158247	0.164041	0.168721	0.172334	0.176576	0.181956	0.187514	0.192514	0.199408	0.206695	0.212417	0.218887	0.224913	0.22951	0.232119	0.237831	0.245606	0.248174	0.254579	0.263	0.270033	0.274647	0.274796	0.280555	0.286501	0.290219	0.29445	0.298956	0.302764	0.310718	0.316258
csedlakii_ID953	Carbon	L-Leucine	D10	0.103993	0.105896	0.10037	0.100165	0.103752	0.109725	0.112591	0.114656	0.115926	0.117379	0.118683	0.11822	0.117982	0.118046	0.118812	0.119666	0.120777	0.120082	0.119276	0.1187	0.119662	0.119294	0.120416	0.121615	0.122569	0.122699	0.123503	0.124365	0.124129	0.124986	0.124171	0.125631	0.125538	0.12542	0.128051	0.130086	0.130368	0.128035	0.128072	0.129888	0.129977	0.130691	0.128801	0.128354	0.128882	0.131614
csedlakii_ID953	Carbon	D-Aspartic Acid	D11	0.102169	0.102559	0.0981373	0.0985038	0.102102	0.106159	0.108835	0.109727	0.111368	0.112737	0.114146	0.113594	0.113705	0.113137	0.1141	0.11475	0.115727	0.114874	0.115367	0.115366	0.116772	0.116481	0.11734	0.118592	0.11857	0.118491	0.118932	0.11949	0.11969	0.120338	0.119254	0.120886	0.120688	0.120185	0.122043	0.123111	0.12265	0.120835	0.120681	0.122096	0.123237	0.124048	0.123813	0.124123	0.125294	0.127157
csedlakii_ID953	Carbon	Inosine	D12	0.0959159	0.10102	0.101206	0.103872	0.110637	0.11576	0.121159	0.126279	0.135035	0.142284	0.152062	0.16354	0.180226	0.198947	0.235009	0.268317	0.32334	0.399382	0.442646	0.491288	0.5022	0.557998	0.579923	0.602326	0.602685	0.609446	0.61395	0.626657	0.618399	0.624931	0.63228	0.633814	0.635223	0.640817	0.656669	0.659457	0.666647	0.675031	0.679687	0.686718	0.678682	0.685167	0.683722	0.684234	0.691304	0.693823
csedlakii_ID953	Carbon	Thymidine	E1	0.103186	0.101005	0.103142	0.115908	0.1219	0.125266	0.133682	0.139439	0.147334	0.15835	0.170114	0.181189	0.188846	0.202866	0.223635	0.243085	0.259484	0.272058	0.258715	0.244233	0.229093	0.223484	0.221276	0.221662	0.221528	0.219489	0.217547	0.217521	0.217407	0.216238	0.21546	0.215024	0.213736	0.215088	0.213682	0.214796	0.216564	0.218566	0.220051	0.223353	0.219383	0.225921	0.224625	0.219848	0.213619	0.212994
csedlakii_ID953	Carbon	Sucrose	E2	0.103408	0.107981	0.107768	0.111609	0.121104	0.131026	0.141916	0.152835	0.162259	0.164986	0.168326	0.17494	0.184011	0.190943	0.195488	0.198185	0.200054	0.199797	0.194147	0.189356	0.187228	0.185636	0.185268	0.18622	0.185323	0.185017	0.184442	0.182974	0.183282	0.182213	0.18129	0.180972	0.179434	0.177532	0.176183	0.177338	0.178557	0.175239	0.173596	0.171515	0.167429	0.165866	0.160984	0.157198	0.154166	0.152607
csedlakii_ID953	Carbon	D-Xylose	E3	0.105476	0.104558	0.101295	0.102588	0.105908	0.109855	0.113462	0.11825	0.124889	0.135385	0.149468	0.161753	0.175294	0.191677	0.211218	0.243708	0.289489	0.341197	0.402486	0.444709	0.457736	0.387451	0.406564	0.411011	0.40599	0.42204	0.404935	0.425795	0.425183	0.423208	0.438017	0.452541	0.43885	0.459704	0.467909	0.480382	0.489553	0.497454	0.496973	0.517525	0.517431	0.518606	0.520187	0.515701	0.531109	0.522628
csedlakii_ID953	Carbon	L-Cysteine	E4	0.102084	0.102899	0.0987858	0.0991385	0.101748	0.104491	0.106828	0.10932	0.110886	0.112957	0.115118	0.11577	0.116614	0.117374	0.118555	0.119791	0.121283	0.120214	0.118513	0.117093	0.117333	0.118617	0.11983	0.121194	0.121957	0.122725	0.124026	0.125547	0.125981	0.128302	0.128412	0.128782	0.129856	0.130618	0.132966	0.136038	0.137334	0.137218	0.138486	0.138753	0.137368	0.137331	0.135424	0.133963	0.132631	0.135146
csedlakii_ID953	Carbon	Alpha-D-Lactose	E5	0.100591	0.103788	0.101413	0.100836	0.101703	0.103443	0.105594	0.107143	0.108296	0.11077	0.112611	0.114049	0.114905	0.116202	0.117905	0.11961	0.12329	0.121854	0.12167	0.122412	0.126766	0.130821	0.137661	0.15388	0.175444	0.193874	0.180916	0.197664	0.217152	0.238099	0.258968	0.285919	0.316039	0.36112	0.405583	0.443043	0.457894	0.465994	0.492456	0.522024	0.519243	0.545083	0.548165	0.564798	0.576497	0.584132
csedlakii_ID953	Carbon	Raffinose	E6	0.101546	0.105733	0.107006	0.107806	0.111286	0.11689	0.125659	0.131292	0.139101	0.150325	0.160383	0.168403	0.175568	0.18304	0.190178	0.193122	0.196135	0.194285	0.190812	0.191787	0.193987	0.185137	0.177665	0.17979	0.178093	0.168094	0.157571	0.155368	0.152902	0.150838	0.14889	0.148504	0.146974	0.146542	0.147577	0.15004	0.149695	0.148971	0.148267	0.147623	0.146312	0.146188	0.142812	0.141467	0.141777	0.142359
csedlakii_ID953	Carbon	D-Asparagine	E7	0.101958	0.102961	0.0989204	0.0988472	0.10065	0.105117	0.108323	0.110661	0.112064	0.11405	0.115534	0.116035	0.115638	0.116835	0.118009	0.11861	0.120108	0.119329	0.117717	0.116684	0.117522	0.117968	0.118923	0.120899	0.121549	0.121745	0.122755	0.124005	0.124193	0.124942	0.124883	0.12634	0.126647	0.127524	0.130326	0.133878	0.135318	0.13465	0.135155	0.135533	0.135176	0.135735	0.133758	0.132804	0.133331	0.135259
csedlakii_ID953	Carbon	Erythritol	E8	0.0994692	0.101225	0.0991615	0.0992233	0.101855	0.106012	0.10911	0.111231	0.112044	0.114404	0.115961	0.115821	0.115018	0.115789	0.116765	0.117332	0.118777	0.117788	0.116079	0.115065	0.115687	0.11611	0.116465	0.117942	0.118322	0.118238	0.118973	0.120096	0.119864	0.120434	0.120265	0.121754	0.12196	0.122453	0.12541	0.12853	0.129073	0.127935	0.128175	0.128637	0.128309	0.12875	0.126423	0.125732	0.126215	0.128281
csedlakii_ID953	Carbon	D-Cysteine	E9	0.104751	0.105623	0.103432	0.103719	0.106731	0.112973	0.115015	0.115436	0.114933	0.116163	0.11667	0.115086	0.113954	0.113945	0.114245	0.114225	0.114958	0.113251	0.112059	0.111929	0.11313	0.113859	0.114698	0.116042	0.116863	0.117333	0.118232	0.119504	0.119532	0.119699	0.119898	0.120344	0.120395	0.120816	0.12253	0.124705	0.124327	0.123009	0.123157	0.123499	0.123673	0.124657	0.123528	0.123841	0.124916	0.126824
csedlakii_ID953	Carbon	L-Isoleucine	E10	0.103173	0.10566	0.102166	0.102855	0.10711	0.113823	0.117458	0.119557	0.120852	0.122419	0.123185	0.122346	0.121638	0.121802	0.122529	0.123329	0.124847	0.124013	0.123564	0.123955	0.125172	0.125469	0.126323	0.127512	0.128262	0.128623	0.129478	0.130381	0.129885	0.13024	0.129319	0.131025	0.13117	0.130668	0.133229	0.135594	0.134699	0.132822	0.132803	0.133877	0.133979	0.13502	0.133018	0.133494	0.135185	0.138061
csedlakii_ID953	Carbon	L-Cysteic Acid	E11	0.101614	0.104813	0.0998326	0.0998784	0.105829	0.11111	0.114076	0.114805	0.115076	0.116623	0.117622	0.115974	0.115451	0.114796	0.115112	0.115518	0.116511	0.11414	0.114093	0.11438	0.115196	0.115165	0.115777	0.115991	0.116189	0.116646	0.11714	0.117008	0.116577	0.116398	0.115491	0.11655	0.116679	0.115782	0.116786	0.117221	0.116148	0.114034	0.113592	0.114646	0.115557	0.115657	0.115048	0.115958	0.117427	0.119274
csedlakii_ID953	Carbon	Adenosine	E12	0.100658	0.101284	0.102333	0.106614	0.113115	0.117794	0.122326	0.127799	0.135732	0.145465	0.155997	0.167322	0.177877	0.192075	0.216134	0.234567	0.25517	0.278194	0.298658	0.326412	0.353679	0.37648	0.396238	0.422925	0.449587	0.460895	0.477281	0.48757	0.48972	0.501811	0.507422	0.514491	0.516612	0.519742	0.53864	0.549648	0.547635	0.549735	0.548052	0.550071	0.550931	0.553447	0.552486	0.555395	0.545344	0.544542
csedlakii_ID953	Carbon	Xylitol	F1	0.0949562	0.0956392	0.0969524	0.108092	0.109818	0.111815	0.116771	0.117443	0.11773	0.118208	0.118776	0.119383	0.119973	0.119722	0.121537	0.122429	0.122169	0.121184	0.119578	0.118022	0.118779	0.119312	0.119138	0.120464	0.120246	0.120765	0.120406	0.122074	0.121159	0.12239	0.122508	0.123643	0.123744	0.124162	0.125144	0.128257	0.129861	0.131486	0.132155	0.131057	0.129738	0.128735	0.12691	0.124181	0.123124	0.124294
csedlakii_ID953	Carbon	L-Glutamine	F2	0.10064	0.102199	0.100549	0.10791	0.113519	0.11728	0.120997	0.124642	0.127839	0.131725	0.136876	0.140777	0.144505	0.158784	0.163948	0.158977	0.163781	0.165302	0.166675	0.169979	0.175776	0.182919	0.189713	0.198289	0.203386	0.210112	0.215755	0.221046	0.226883	0.234646	0.238432	0.242447	0.247421	0.25185	0.258107	0.266278	0.270283	0.273256	0.276793	0.280602	0.28563	0.291443	0.295968	0.300058	0.306886	0.314193
csedlakii_ID953	Carbon	L-Rhamnose	F3	0.101754	0.102871	0.0983142	0.10039	0.104288	0.108209	0.112156	0.115824	0.118723	0.122786	0.128077	0.134231	0.142426	0.153061	0.164998	0.177387	0.191415	0.212659	0.232455	0.270284	0.335473	0.408067	0.44879	0.427999	0.40824	0.38357	0.363646	0.371702	0.377711	0.3818	0.390558	0.417915	0.418254	0.448632	0.456656	0.480318	0.504494	0.50003	0.510616	0.529403	0.527979	0.553244	0.551089	0.561798	0.573612	0.570299
csedlakii_ID953	Carbon	Putrescine	F4	0.102647	0.104408	0.0987725	0.0999795	0.103055	0.105927	0.108802	0.112051	0.114025	0.116155	0.118516	0.120119	0.120664	0.121693	0.124046	0.125685	0.127464	0.1266	0.124533	0.123712	0.123689	0.125131	0.126958	0.129004	0.129527	0.130506	0.131981	0.134159	0.134788	0.137477	0.138195	0.13929	0.140767	0.142083	0.144815	0.148533	0.15074	0.151699	0.153228	0.1532	0.15219	0.151812	0.149979	0.147927	0.146323	0.147601
csedlakii_ID953	Carbon	2 Deoxy-D-Ribose	F5	0.106116	0.106396	0.101592	0.10235	0.104725	0.10827	0.111972	0.115142	0.117721	0.120814	0.123076	0.124421	0.125354	0.126794	0.128813	0.129703	0.131833	0.130642	0.128531	0.127876	0.128511	0.130228	0.132469	0.133598	0.134995	0.136024	0.136902	0.13892	0.139556	0.141502	0.142908	0.143897	0.145637	0.147056	0.150749	0.154454	0.156263	0.15653	0.158182	0.1575	0.157265	0.158587	0.157345	0.155484	0.156338	0.157464
csedlakii_ID953	Carbon	L-Arabitol	F6	0.100762	0.102633	0.0990521	0.099489	0.1015	0.104716	0.108552	0.110939	0.112571	0.1149	0.116632	0.117297	0.117626	0.119029	0.120794	0.121539	0.123655	0.122053	0.119694	0.118131	0.118565	0.119843	0.121755	0.123197	0.123923	0.124627	0.125879	0.127837	0.129655	0.131271	0.132935	0.13467	0.136143	0.138393	0.142122	0.146155	0.147967	0.148165	0.149449	0.149626	0.148633	0.149595	0.148266	0.146653	0.147173	0.148539
csedlakii_ID953	Carbon	D-Glucosamine	F7	0.103526	0.10752	0.107075	0.110498	0.116196	0.124393	0.132918	0.14163	0.149271	0.1559	0.164762	0.174708	0.189063	0.207461	0.230929	0.258271	0.284971	0.346422	0.411492	0.444355	0.448345	0.464668	0.469229	0.500042	0.516309	0.524703	0.537572	0.557915	0.563963	0.571023	0.574692	0.577044	0.588478	0.593231	0.598421	0.601028	0.605199	0.614721	0.619816	0.621545	0.623425	0.625721	0.629968	0.634158	0.639102	0.638261
csedlakii_ID953	Carbon	L-Phenylalanine	F8	0.104587	0.103489	0.0985772	0.100522	0.103143	0.109097	0.113587	0.117462	0.119701	0.123376	0.125484	0.126266	0.126664	0.127803	0.129369	0.130369	0.131952	0.13149	0.129937	0.129741	0.130847	0.131675	0.132521	0.134416	0.135134	0.135593	0.136799	0.137902	0.138718	0.138651	0.139192	0.140057	0.140869	0.141277	0.143773	0.147099	0.147285	0.146332	0.146487	0.146284	0.146348	0.14716	0.145587	0.144795	0.146641	0.148853
csedlakii_ID953	Carbon	D-Glutamic Acid	F9	0.101335	0.102555	0.0997837	0.0999161	0.103628	0.109873	0.112739	0.113644	0.113526	0.11575	0.116778	0.115771	0.114907	0.115242	0.115358	0.115855	0.116699	0.114807	0.112875	0.112339	0.113013	0.113296	0.114364	0.115282	0.115342	0.116044	0.116277	0.117085	0.117454	0.118	0.117894	0.118581	0.119625	0.119833	0.121653	0.123762	0.12337	0.122684	0.12299	0.123332	0.123535	0.124357	0.123692	0.123895	0.125873	0.127687
csedlakii_ID953	Carbon	D-Arabinose	F10	0.103871	0.105227	0.0995872	0.101244	0.105679	0.112245	0.116776	0.118938	0.120238	0.122521	0.123786	0.123146	0.122605	0.123129	0.124176	0.126115	0.12839	0.12792	0.128338	0.130757	0.135425	0.14034	0.147588	0.155635	0.160805	0.168057	0.181791	0.194134	0.202542	0.20949	0.217346	0.226607	0.236661	0.248602	0.273142	0.298521	0.317357	0.332253	0.347244	0.364267	0.385656	0.399616	0.421651	0.432877	0.452761	0.463433
csedlakii_ID953	Carbon	L-Tryptophan	F11	0.103355	0.107739	0.104952	0.108331	0.115129	0.123977	0.130393	0.134918	0.137947	0.141854	0.145383	0.145693	0.145838	0.146895	0.148274	0.150605	0.153084	0.152413	0.152734	0.154295	0.155401	0.15635	0.158122	0.159504	0.16025	0.160578	0.160747	0.160368	0.159908	0.15974	0.157597	0.158278	0.158501	0.156502	0.158674	0.159956	0.159034	0.156631	0.157194	0.158026	0.157773	0.157372	0.154999	0.153513	0.154822	0.155045
csedlakii_ID953	Carbon	L-Pyro-Glutamic Acid	F12	0.0965236	0.100292	0.0992344	0.105531	0.110093	0.111485	0.11359	0.115568	0.118438	0.121736	0.124107	0.125556	0.12757	0.129139	0.130802	0.132043	0.133942	0.13355	0.137044	0.139937	0.143596	0.145367	0.149212	0.149768	0.152258	0.154871	0.154579	0.154549	0.155381	0.155743	0.154879	0.159758	0.163558	0.165239	0.169172	0.170206	0.162613	0.154215	0.152013	0.154573	0.15902	0.16003	0.16056	0.169691	0.179228	0.181107
csedlakii_ID953	Nitrogen	Negative Control	G1	0.101901	0.11588	0.118721	0.129014	0.137905	0.14696	0.152413	0.157286	0.160248	0.163061	0.16776	0.171464	0.175444	0.179029	0.185854	0.190496	0.195414	0.196443	0.194919	0.193685	0.194946	0.196558	0.200198	0.205034	0.209198	0.213672	0.219539	0.223446	0.227136	0.230692	0.234309	0.239312	0.244757	0.246662	0.251566	0.262481	0.265428	0.268567	0.267999	0.269354	0.267818	0.269433	0.263898	0.258524	0.255256	0.253054
csedlakii_ID953	Nitrogen	Tyramine	G2	0.101848	0.107725	0.109431	0.132674	0.137701	0.139906	0.143504	0.133131	0.133899	0.135629	0.138514	0.152043	0.152072	0.147478	0.151093	0.152051	0.154543	0.153577	0.152939	0.152086	0.152307	0.15289	0.153775	0.154992	0.155031	0.156297	0.156049	0.159447	0.160926	0.16302	0.165284	0.168542	0.169065	0.172453	0.175383	0.181919	0.185809	0.188912	0.190474	0.193801	0.195539	0.198193	0.197997	0.196828	0.19751	0.199572
csedlakii_ID953	Nitrogen	Uridine	G3	0.100994	0.10621	0.108011	0.117158	0.127191	0.136428	0.143475	0.148943	0.153229	0.157347	0.162932	0.167918	0.172982	0.178124	0.186598	0.193561	0.199622	0.203835	0.205745	0.207049	0.211064	0.216006	0.220113	0.225991	0.229944	0.233706	0.237299	0.24194	0.245066	0.250179	0.252413	0.255756	0.25809	0.260914	0.264483	0.270185	0.272014	0.272025	0.27367	0.273506	0.273581	0.273587	0.272344	0.268862	0.268016	0.269993
csedlakii_ID953	Nitrogen	Inosine	G4	0.100518	0.105944	0.109388	0.116589	0.126975	0.133228	0.140464	0.144555	0.148619	0.152586	0.156079	0.158908	0.161184	0.164014	0.169471	0.174315	0.178104	0.179997	0.179793	0.1805	0.183257	0.187557	0.19278	0.196292	0.199922	0.202705	0.205536	0.210747	0.212072	0.215982	0.218817	0.222598	0.224675	0.227843	0.233665	0.23944	0.242073	0.243488	0.245368	0.246551	0.246186	0.246164	0.244006	0.240034	0.2381	0.238558
csedlakii_ID953	Nitrogen	Histamine	G5	0.10298	0.109134	0.110088	0.113972	0.127423	0.135501	0.139648	0.14286	0.145661	0.148312	0.151144	0.153254	0.155425	0.157954	0.162058	0.16592	0.169622	0.171684	0.171628	0.170907	0.172347	0.17534	0.178387	0.181744	0.185343	0.1867	0.189994	0.194191	0.195462	0.1981	0.200636	0.203705	0.204546	0.206546	0.212401	0.217897	0.221392	0.222801	0.22352	0.224489	0.222675	0.222415	0.218298	0.211866	0.207968	0.206754
csedlakii_ID953	Nitrogen	L-Pyro-Glutamic Acid	G6	0.101839	0.106646	0.106483	0.110211	0.122283	0.130978	0.137631	0.143709	0.148086	0.151996	0.157013	0.163577	0.171445	0.181064	0.19051	0.198584	0.20731	0.21453	0.218376	0.222948	0.228858	0.235694	0.240915	0.244766	0.247265	0.248216	0.247502	0.249086	0.249862	0.248313	0.251663	0.255312	0.256381	0.260055	0.26564	0.271934	0.274465	0.275426	0.276091	0.276553	0.27377	0.275377	0.272247	0.269693	0.269976	0.270347
csedlakii_ID953	Nitrogen	Cytidine	G7	0.101551	0.104154	0.10686	0.111453	0.122504	0.131042	0.142256	0.156679	0.174151	0.196455	0.228719	0.269999	0.332524	0.441297	0.548207	0.561472	0.573461	0.597273	0.586043	0.594894	0.616335	0.627452	0.629928	0.639109	0.641687	0.646209	0.649137	0.653031	0.659365	0.661325	0.661086	0.665455	0.663218	0.669962	0.675423	0.675901	0.676406	0.676538	0.679263	0.678289	0.68084	0.684029	0.680655	0.67975	0.689136	0.692598
csedlakii_ID953	Nitrogen	Adenosine	G8	0.101934	0.103184	0.108312	0.112041	0.123483	0.132782	0.146243	0.163986	0.183163	0.205688	0.231597	0.263242	0.297761	0.328319	0.359362	0.379731	0.390703	0.398424	0.407573	0.411518	0.419627	0.420206	0.421427	0.430728	0.437855	0.449349	0.458688	0.470158	0.478534	0.487137	0.494582	0.501796	0.50825	0.514188	0.522668	0.530685	0.534486	0.538519	0.543387	0.545834	0.547206	0.551699	0.552244	0.554657	0.557431	0.562012
csedlakii_ID953	Nitrogen	L-Arginine	G9	0.10105	0.106967	0.109172	0.114071	0.126276	0.135466	0.143725	0.150893	0.157339	0.164991	0.172573	0.181026	0.190357	0.201589	0.215356	0.229215	0.244986	0.257213	0.270362	0.284586	0.300396	0.314999	0.329783	0.343049	0.353626	0.358874	0.361836	0.363209	0.358041	0.352227	0.34914	0.348098	0.347091	0.347018	0.352076	0.355608	0.356906	0.357244	0.358277	0.359283	0.358775	0.358665	0.357434	0.356004	0.358414	0.35952
csedlakii_ID953	Nitrogen	Thiourea	G10	0.101239	0.105441	0.106273	0.113997	0.12517	0.13244	0.137425	0.140036	0.142682	0.14738	0.150108	0.152276	0.153427	0.156803	0.160443	0.163468	0.167153	0.167527	0.169254	0.171095	0.174586	0.176764	0.178842	0.182016	0.183836	0.185128	0.18849	0.191015	0.192427	0.194839	0.196654	0.19904	0.202185	0.201968	0.207021	0.211294	0.210856	0.208719	0.208561	0.210005	0.209391	0.211943	0.210438	0.210305	0.213307	0.214319
csedlakii_ID953	Nitrogen	Biuret	G11	0.100575	0.104742	0.106139	0.116897	0.126556	0.136845	0.148137	0.154675	0.160014	0.167052	0.171536	0.174893	0.177523	0.180795	0.18517	0.188895	0.193601	0.19417	0.197744	0.202471	0.208401	0.213668	0.218913	0.224359	0.229276	0.234177	0.239456	0.243053	0.245999	0.249178	0.250782	0.254337	0.257827	0.255814	0.263536	0.265108	0.263905	0.261516	0.262172	0.263397	0.261915	0.262181	0.259819	0.257682	0.260314	0.259732
csedlakii_ID953	Nitrogen	Guanidine	G12	0.100084	0.102027	0.103857	0.109639	0.112276	0.11301	0.113877	0.115032	0.116675	0.118845	0.1204	0.122044	0.12393	0.124592	0.126222	0.127508	0.130848	0.132296	0.140987	0.146833	0.15246	0.156654	0.161737	0.164199	0.168958	0.173416	0.177507	0.180948	0.183625	0.186335	0.188814	0.192498	0.195937	0.196892	0.192315	0.198263	0.196827	0.193945	0.195251	0.198619	0.197318	0.198366	0.203665	0.207319	0.213242	0.214718
csedlakii_ID953	Nitrogen	L-Histidine	H1	0.0961825	0.105953	0.117989	0.126256	0.131459	0.135996	0.141191	0.145194	0.14892	0.152203	0.156932	0.160423	0.165328	0.169177	0.176373	0.181467	0.187265	0.191344	0.19545	0.200524	0.206547	0.212767	0.220301	0.228128	0.23311	0.236627	0.24045	0.241005	0.242548	0.238985	0.225595	0.208159	0.191828	0.181932	0.172707	0.168825	0.16615	0.165931	0.169693	0.173832	0.17615	0.189006	0.204625	0.217348	0.232172	0.245667
csedlakii_ID953	Nitrogen	Thymine	H2	0.0988218	0.10415	0.11523	0.127902	0.137067	0.143501	0.155775	0.153689	0.158136	0.16213	0.167672	0.172767	0.174262	0.17852	0.186271	0.195153	0.197908	0.201647	0.201241	0.197718	0.199441	0.20187	0.205651	0.214621	0.219749	0.223945	0.230735	0.235646	0.241129	0.247931	0.252115	0.25757	0.26301	0.267294	0.274166	0.281201	0.285373	0.288687	0.291799	0.294273	0.295772	0.297801	0.296298	0.291033	0.285173	0.286141
csedlakii_ID953	Nitrogen	L-Glutathione	H3	0.0987423	0.104031	0.109231	0.122999	0.136368	0.149484	0.161123	0.169449	0.182004	0.195956	0.21209	0.228952	0.246325	0.26099	0.272388	0.283845	0.298209	0.320461	0.347777	0.34799	0.336535	0.335778	0.330922	0.332777	0.336453	0.340598	0.343838	0.348348	0.350581	0.355299	0.35732	0.360623	0.362859	0.367961	0.375817	0.384135	0.39028	0.39635	0.39966	0.403538	0.404281	0.41014	0.408052	0.40581	0.405974	0.408032
csedlakii_ID953	Nitrogen	Allantoin	H4	0.0986255	0.103449	0.107449	0.120879	0.132817	0.138252	0.144107	0.148756	0.153473	0.158925	0.164206	0.167366	0.170482	0.173226	0.179576	0.186346	0.191009	0.194152	0.192931	0.190556	0.192559	0.195972	0.20011	0.208848	0.212244	0.21479	0.22028	0.228726	0.234694	0.243525	0.249639	0.256796	0.260104	0.266116	0.274894	0.284569	0.292015	0.296497	0.300907	0.302431	0.302748	0.30483	0.300946	0.290988	0.282922	0.284283
csedlakii_ID953	Nitrogen	Adenine	H5	0.0989934	0.105587	0.105274	0.115741	0.124217	0.130191	0.140122	0.150389	0.156544	0.162044	0.169092	0.175287	0.184624	0.19326	0.203917	0.216334	0.228842	0.242766	0.255464	0.269623	0.284277	0.300242	0.315838	0.326202	0.326263	0.320765	0.321441	0.332649	0.341721	0.350907	0.361623	0.369564	0.375696	0.38392	0.392132	0.404708	0.411791	0.411753	0.422209	0.420913	0.424054	0.433223	0.427987	0.424403	0.425227	0.425038
csedlakii_ID953	Nitrogen	Glycine	H6	0.100253	0.103916	0.10778	0.117578	0.126345	0.132155	0.136081	0.13871	0.141354	0.144851	0.149112	0.152152	0.155653	0.158801	0.163125	0.166028	0.168341	0.171819	0.174281	0.178605	0.183812	0.190826	0.197983	0.20455	0.211679	0.219233	0.226576	0.233473	0.240692	0.24314	0.247399	0.251293	0.252727	0.251091	0.248768	0.244968	0.242846	0.240194	0.240113	0.239663	0.239269	0.239541	0.239663	0.239125	0.240148	0.242174
csedlakii_ID953	Nitrogen	Beta-Phenylethylamine	H7	0.100707	0.104732	0.109158	0.118493	0.124593	0.128456	0.13064	0.133009	0.134441	0.137061	0.140377	0.141343	0.141807	0.143063	0.144908	0.146667	0.14792	0.148651	0.147404	0.147078	0.147285	0.148182	0.150067	0.151811	0.15295	0.15352	0.15552	0.156988	0.158242	0.15994	0.160965	0.163331	0.164771	0.166457	0.169771	0.176796	0.181355	0.184622	0.187031	0.188812	0.187791	0.18873	0.184828	0.180086	0.17564	0.173747
csedlakii_ID953	Nitrogen	L-Proline	H8	0.099823	0.103805	0.106713	0.118847	0.128272	0.133721	0.141372	0.14678	0.151351	0.157177	0.162722	0.167053	0.171679	0.17592	0.182492	0.188167	0.195502	0.202532	0.208439	0.215021	0.222227	0.230878	0.241456	0.250254	0.259639	0.26667	0.275333	0.282876	0.289317	0.290394	0.295765	0.299412	0.30064	0.305752	0.319065	0.331407	0.345025	0.352216	0.364819	0.372527	0.374324	0.382583	0.390451	0.396371	0.399668	0.40477
csedlakii_ID953	Nitrogen	D-Methionine	H9	0.100917	0.109254	0.11116	0.124377	0.133123	0.135929	0.140662	0.144178	0.147684	0.152225	0.156961	0.160475	0.163349	0.166632	0.171507	0.175567	0.180553	0.183407	0.184412	0.184356	0.185815	0.187798	0.191494	0.195236	0.197714	0.198982	0.202745	0.206875	0.211271	0.215234	0.2188	0.223378	0.228043	0.231251	0.23804	0.245356	0.248574	0.251142	0.255074	0.256649	0.255923	0.259234	0.25896	0.256517	0.258094	0.259198
csedlakii_ID953	Nitrogen	Cytosine	H10	0.0992529	0.106456	0.108876	0.121829	0.131089	0.135432	0.140256	0.144168	0.148771	0.154104	0.157691	0.161091	0.162764	0.165138	0.168929	0.1718	0.174957	0.176485	0.179061	0.180945	0.184574	0.187073	0.191487	0.194269	0.198876	0.202148	0.206133	0.210862	0.215131	0.218618	0.222683	0.22743	0.232197	0.234549	0.240518	0.247786	0.250956	0.254298	0.259092	0.263251	0.264061	0.268873	0.269931	0.271718	0.276549	0.279727
csedlakii_ID953	Nitrogen	D-Valine	H11	0.10142	0.107402	0.110054	0.122203	0.12877	0.131566	0.135164	0.137065	0.140057	0.143524	0.146457	0.149844	0.152134	0.154568	0.159298	0.162425	0.165551	0.16847	0.172039	0.173568	0.176728	0.177459	0.1783	0.178225	0.178595	0.178732	0.181836	0.181728	0.18173	0.182956	0.184736	0.183746	0.185354	0.184367	0.185495	0.18717	0.185824	0.184498	0.185418	0.186259	0.187038	0.191324	0.190991	0.191669	0.195142	0.195206
csedlakii_ID953	Nitrogen	N-Acetyl-D-Glucosamine	H12	0.102873	0.103249	0.113529	0.120336	0.125298	0.131051	0.135938	0.141785	0.148157	0.154337	0.162743	0.171362	0.179111	0.185489	0.192991	0.202746	0.214488	0.226559	0.243004	0.257372	0.27627	0.293396	0.323061	0.346774	0.375418	0.409469	0.439441	0.464989	0.480282	0.489389	0.508841	0.512991	0.457579	0.464957	0.449724	0.435516	0.436964	0.428725	0.427533	0.42998	0.425761	0.430786	0.429804	0.423515	0.42832	0.43046
[truncated: 18 more columns]
